# Supplementary material for: Benzamides Substituted with Quinoline-Linked 1,2,4-Oxadiazole: Synthesis, Biological Activity and Toxicity to Zebrafish Embryo
Source: MDPI journal article supplement (doi:10.3390/molecules27123946), 2022-06-20
Supplement: s1 [file s1]

# Supporting Information

## Benzamides Substituted with Quinoline-Linked 1,2,4-Oxadiazole: Synthesis, Biological Activity and Toxicity to Zebrafish Embryo

Bin-Long Sun, Ying-Ying Wang, Sen Yang, Min-Ting Tu, Ying-Ying Shao, Yi Hua, Yi Zhou  
and Cheng-Xia Tan \*

1.  $^1\text{H}$  NMR spectra of **13a~13q**.....S1-S17
2.  $^{13}\text{C}$  NMR spectra of **13a~13q**.....S18-S34
3. ESI-HRMS spectra of **13a~13q**.....S35-S51

# 1. $^1\text{H}$ NMR spectra of 13a~13q

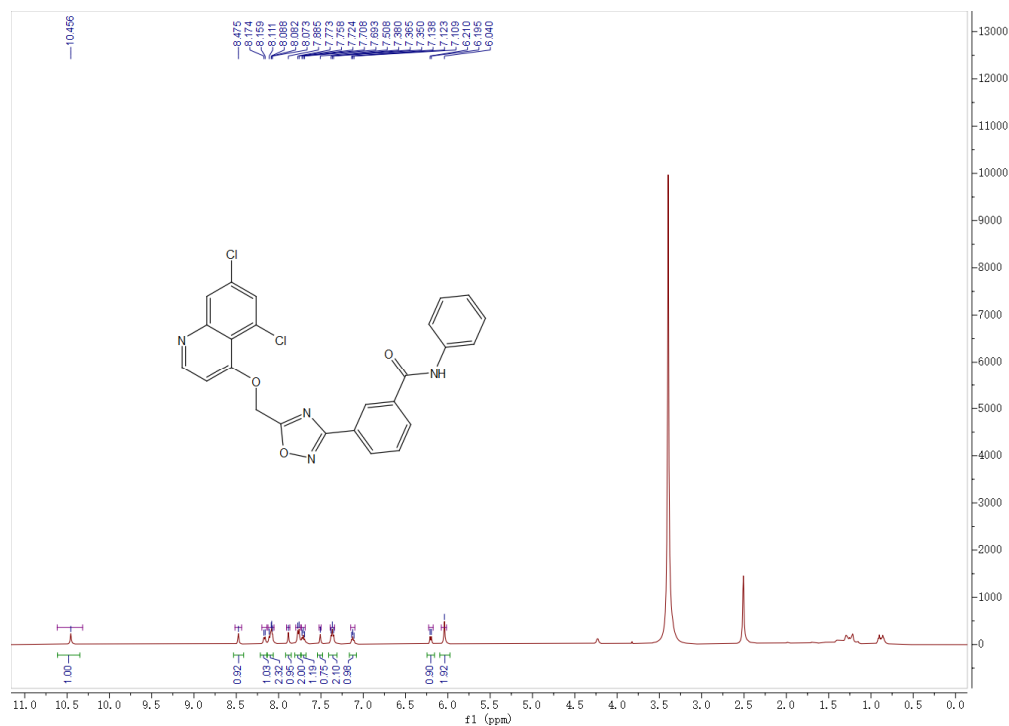

Figure S1.  $^1\text{H}$  NMR spectra of 13a.

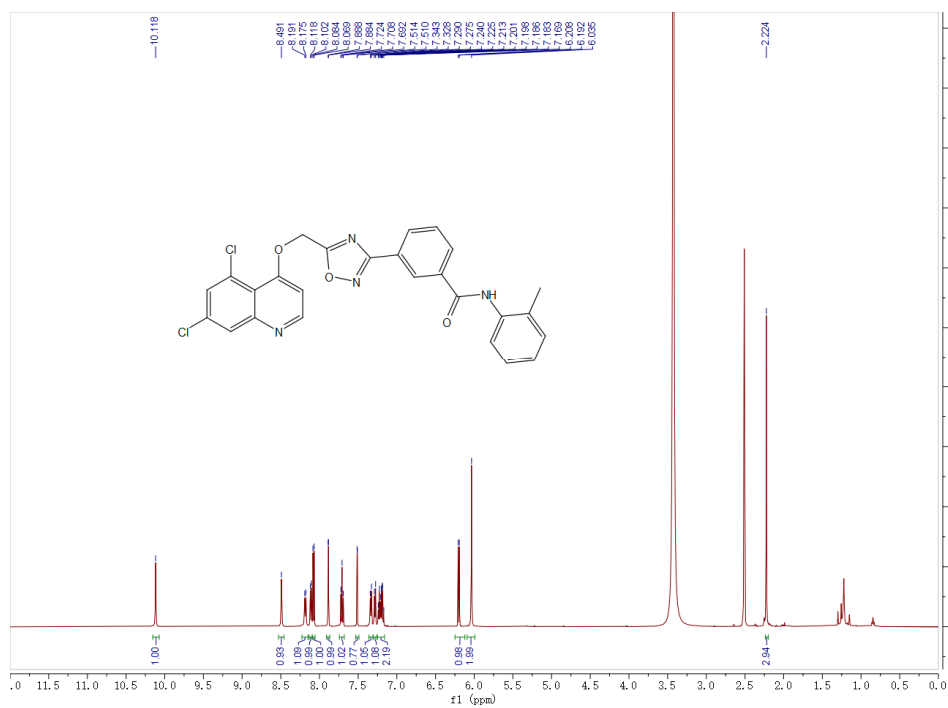

Figure S2.  $^1\text{H}$  NMR spectra of 13b.

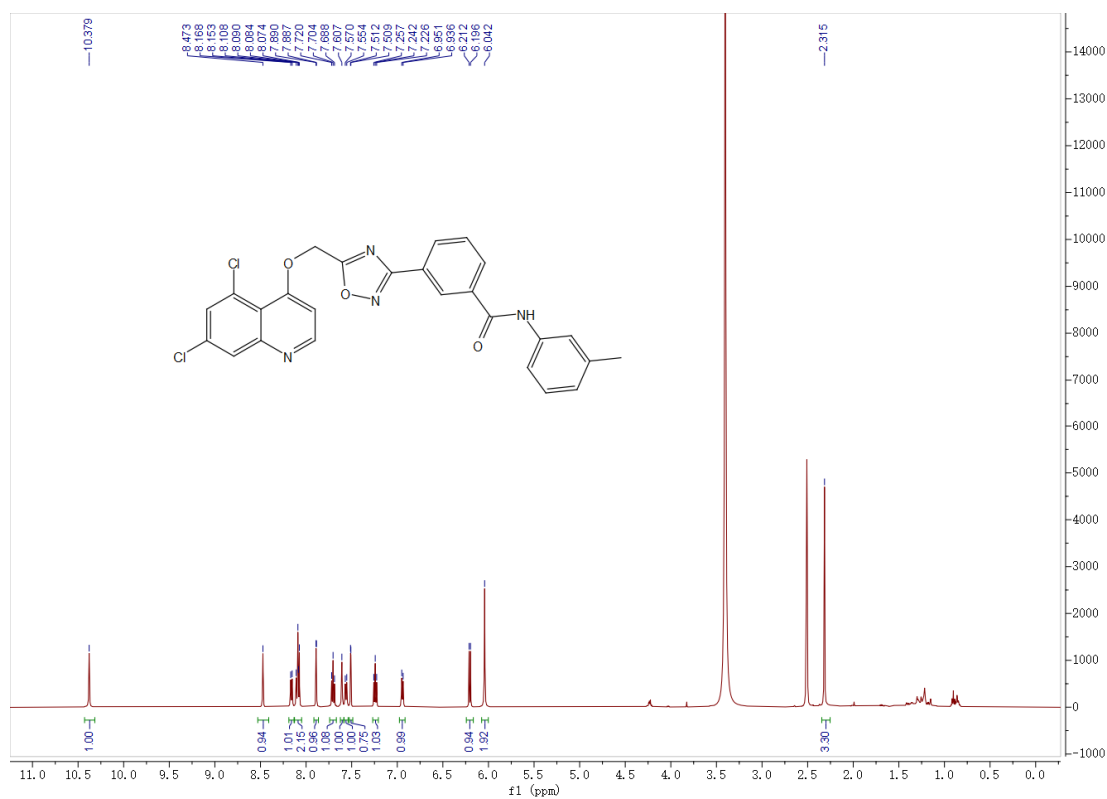

Figure S3. <sup>1</sup>H NMR spectra of 13c.

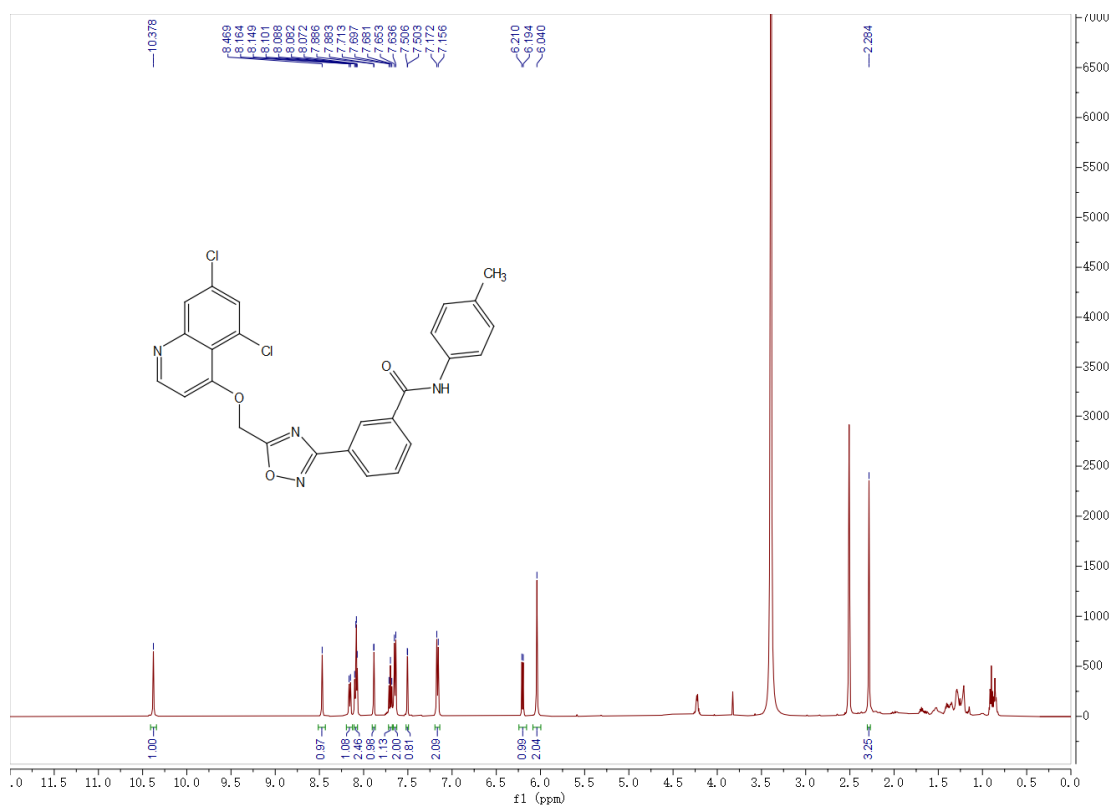

Figure S4. <sup>1</sup>H NMR spectra of 13d.

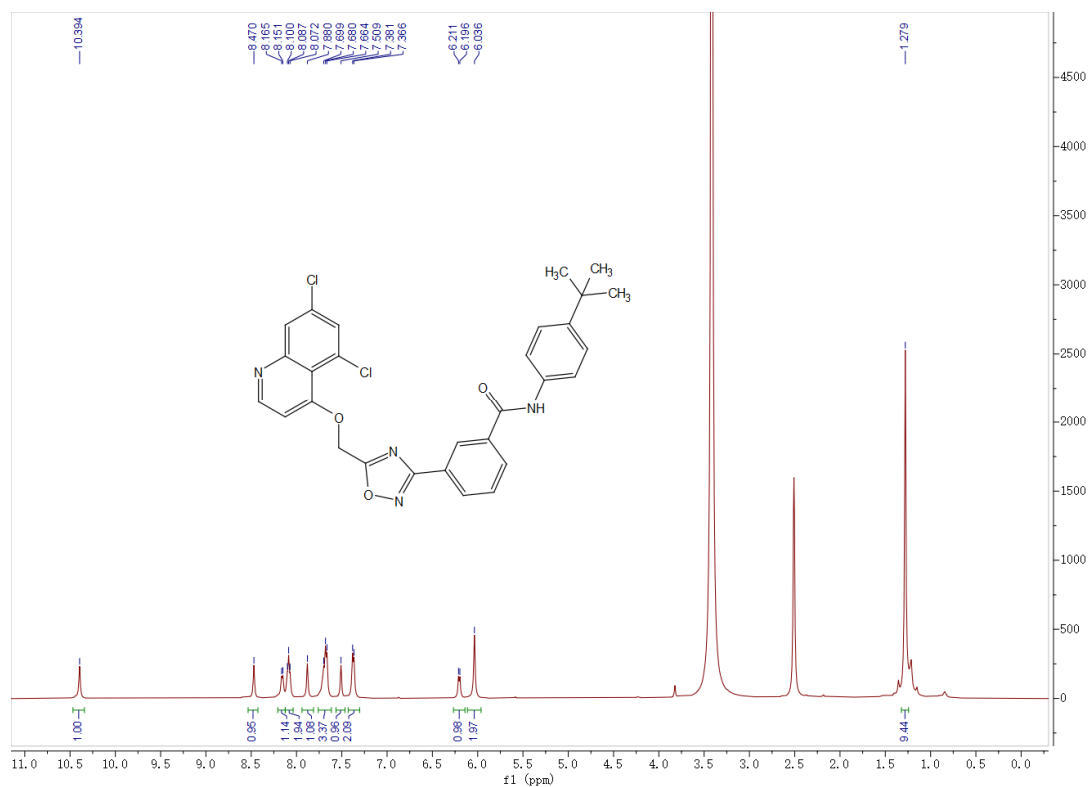

Figure S5. <sup>1</sup>H NMR spectra of 13e.

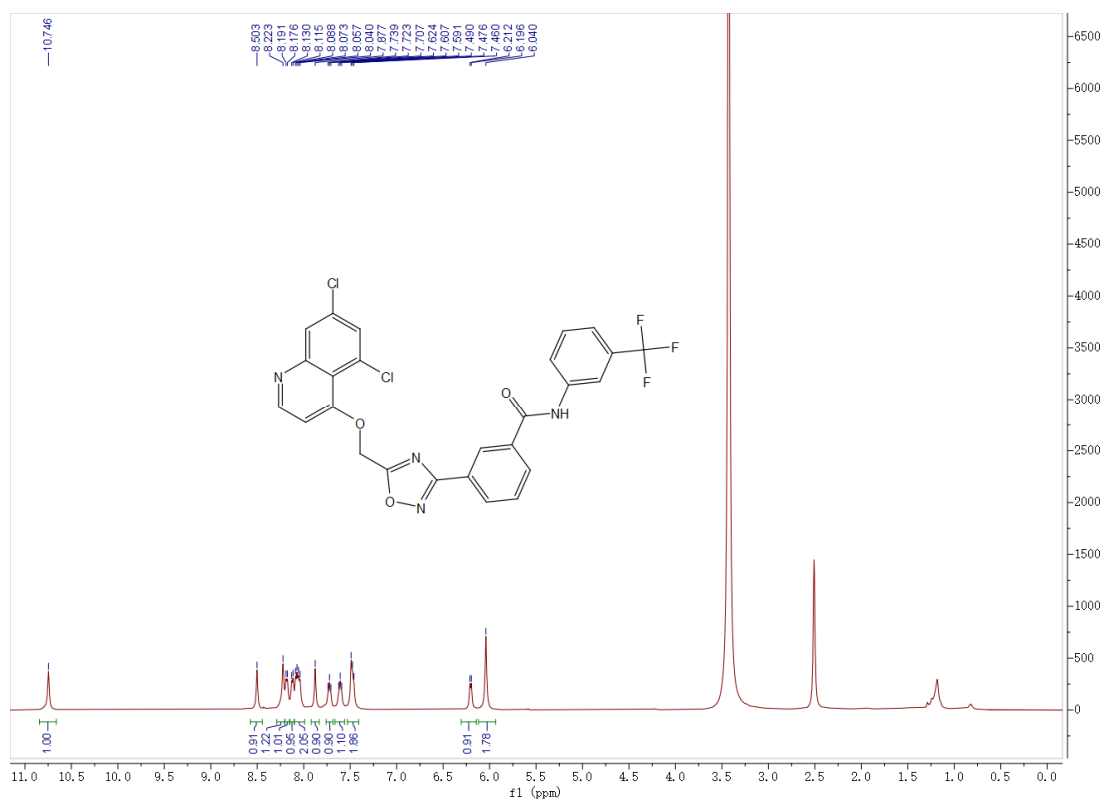

Figure S6. <sup>1</sup>H NMR spectra of 13f.

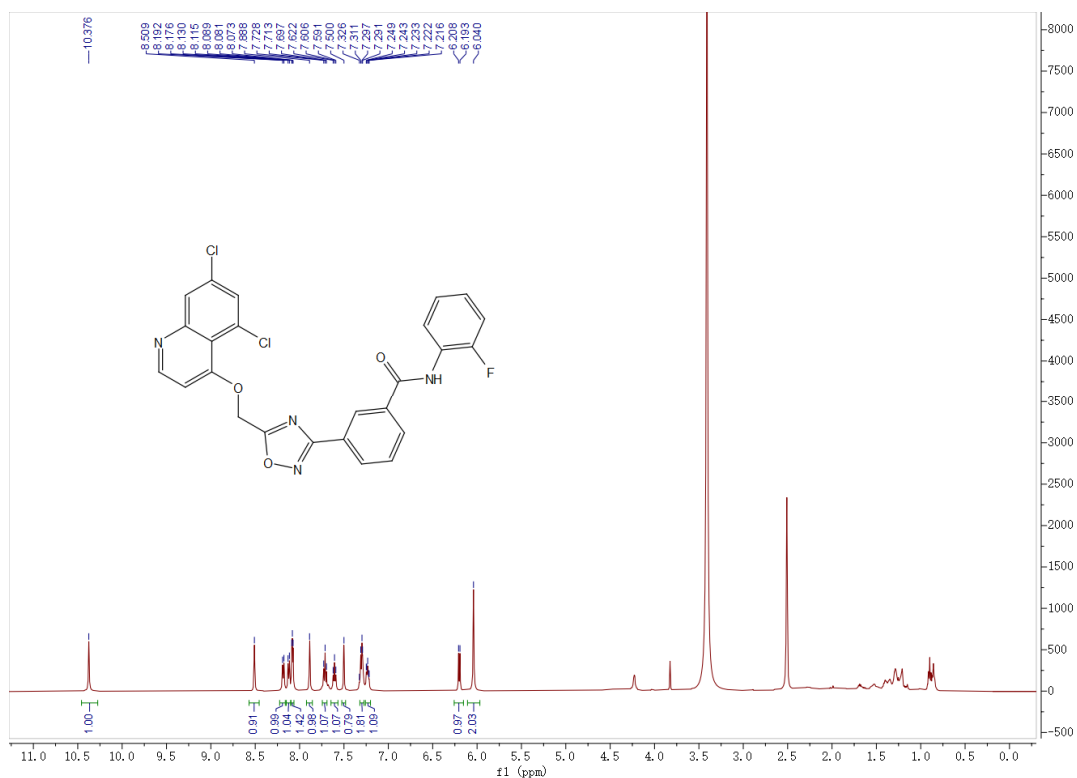

Figure S7. <sup>1</sup>H NMR spectra of 13g.

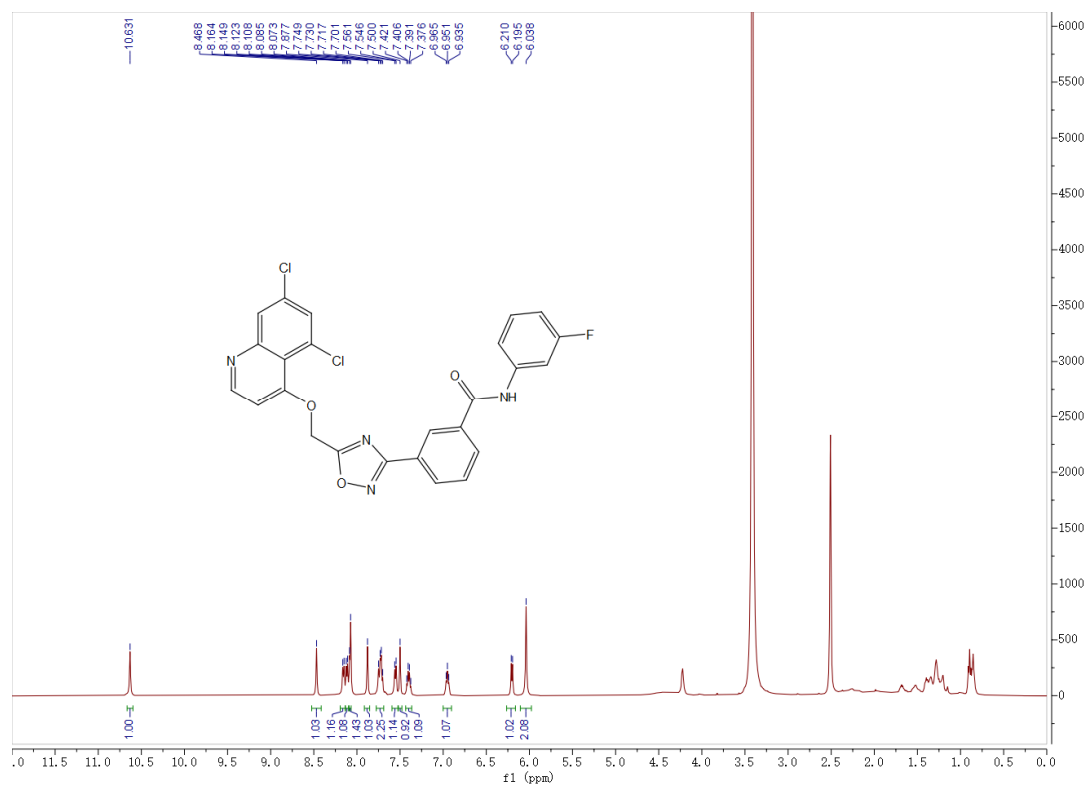

Figure S8. <sup>1</sup>H NMR spectra of 13h.

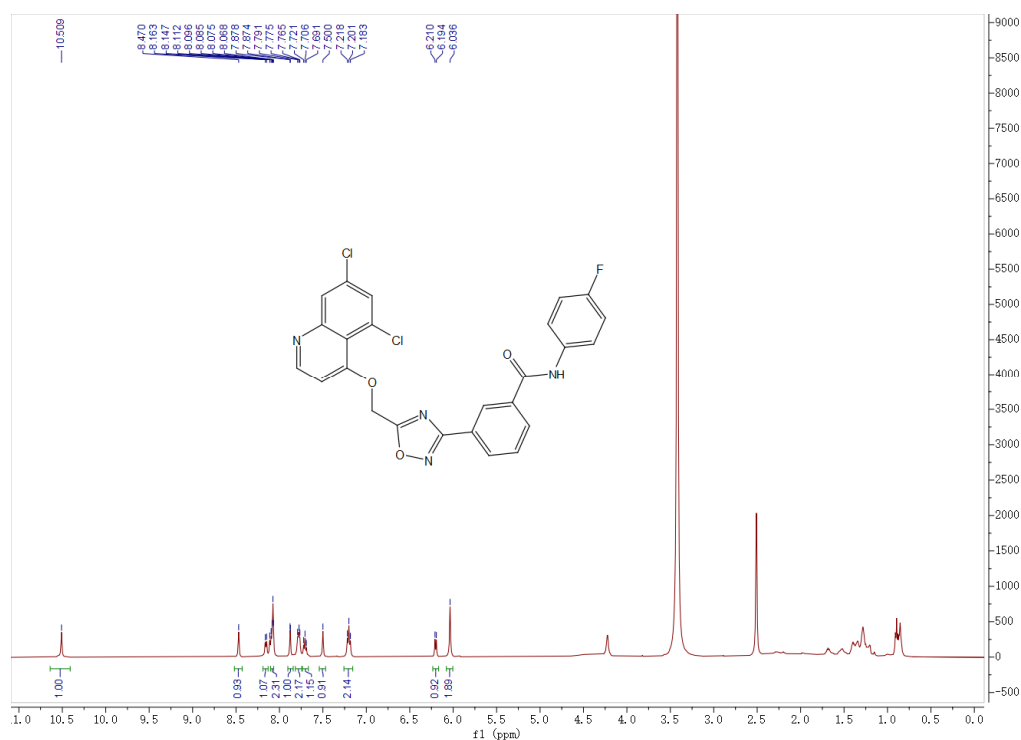

Figure S9. <sup>1</sup>H NMR spectra of 13i.

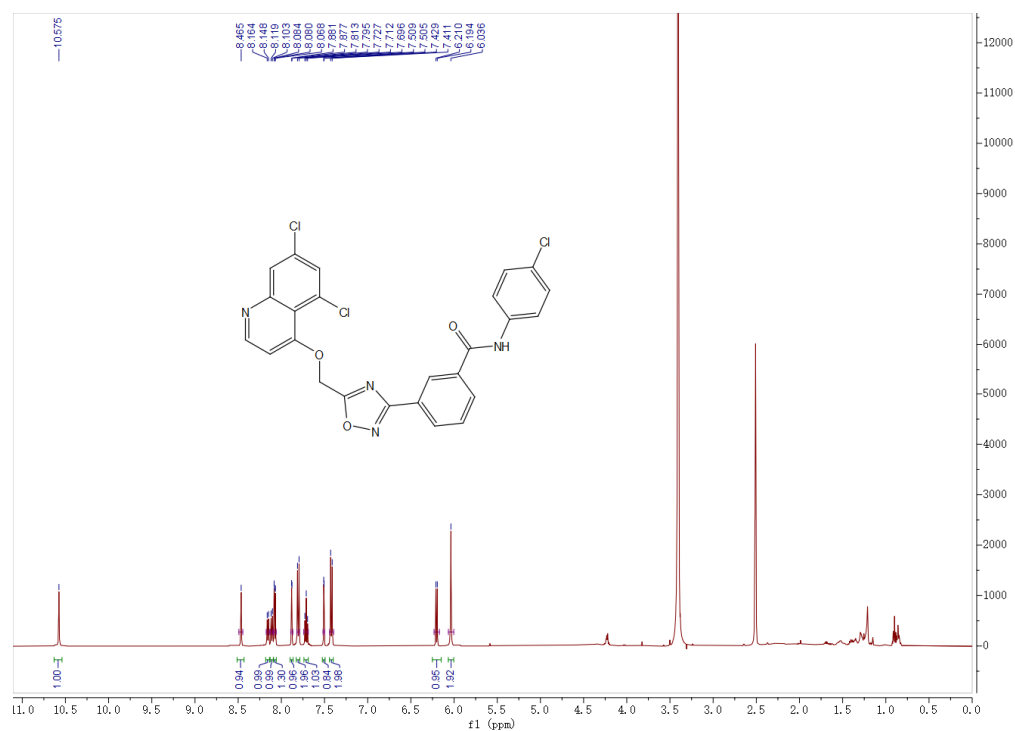

Figure S10. <sup>1</sup>H NMR spectra of 13j.

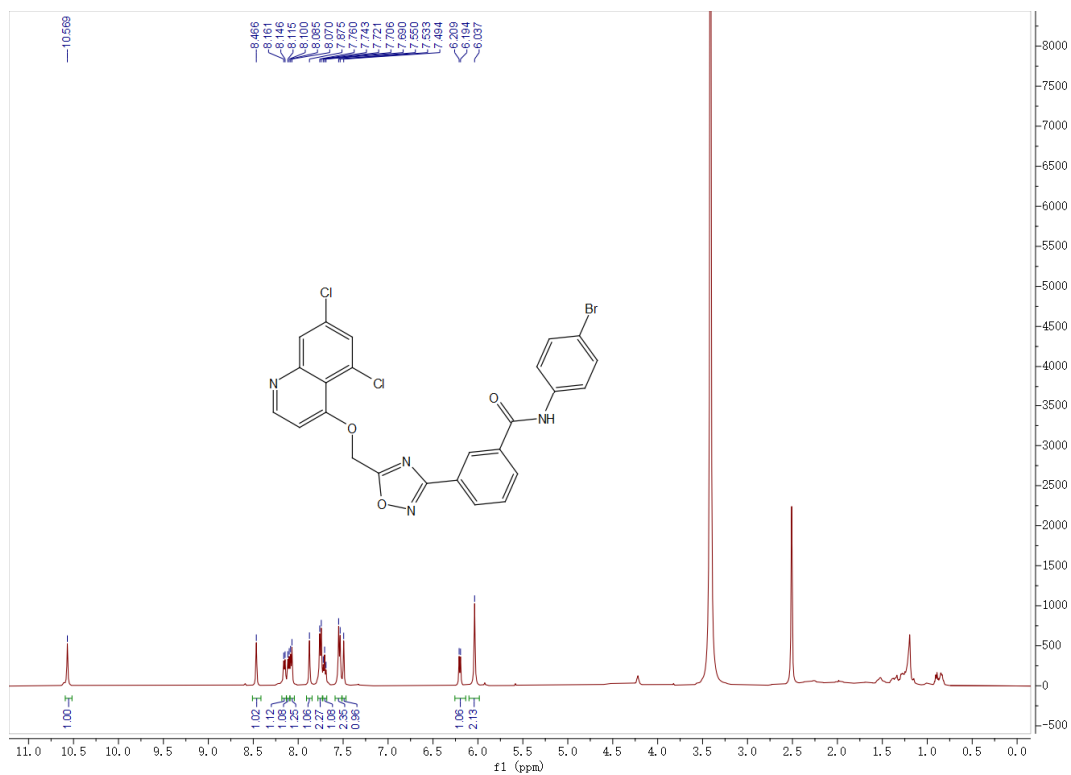

**Figure S11.** <sup>1</sup>H NMR spectra of 13k.

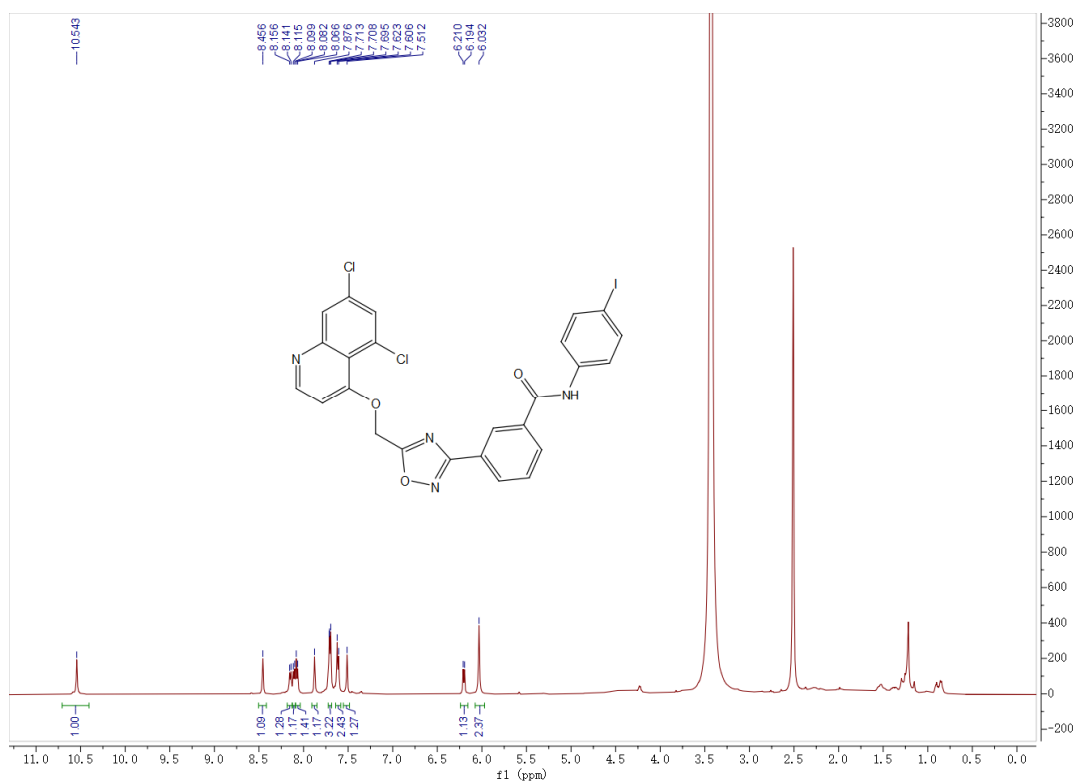

**Figure S12.** <sup>1</sup>H NMR spectra of 13l.

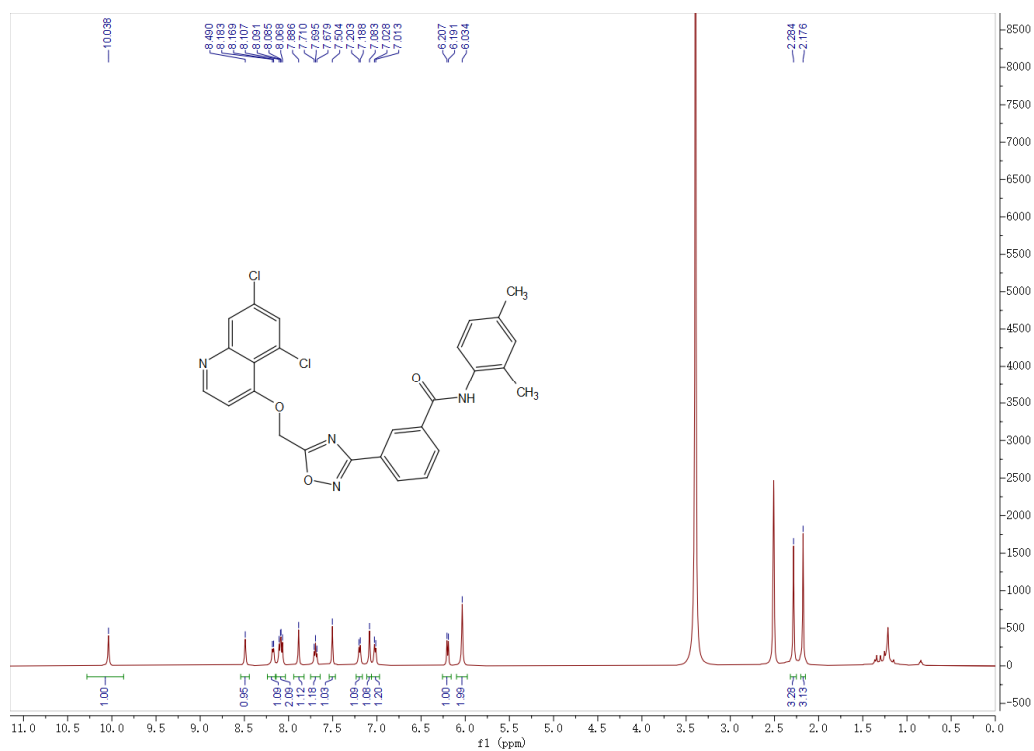

Figure S13. <sup>1</sup>H NMR spectra of 13m.

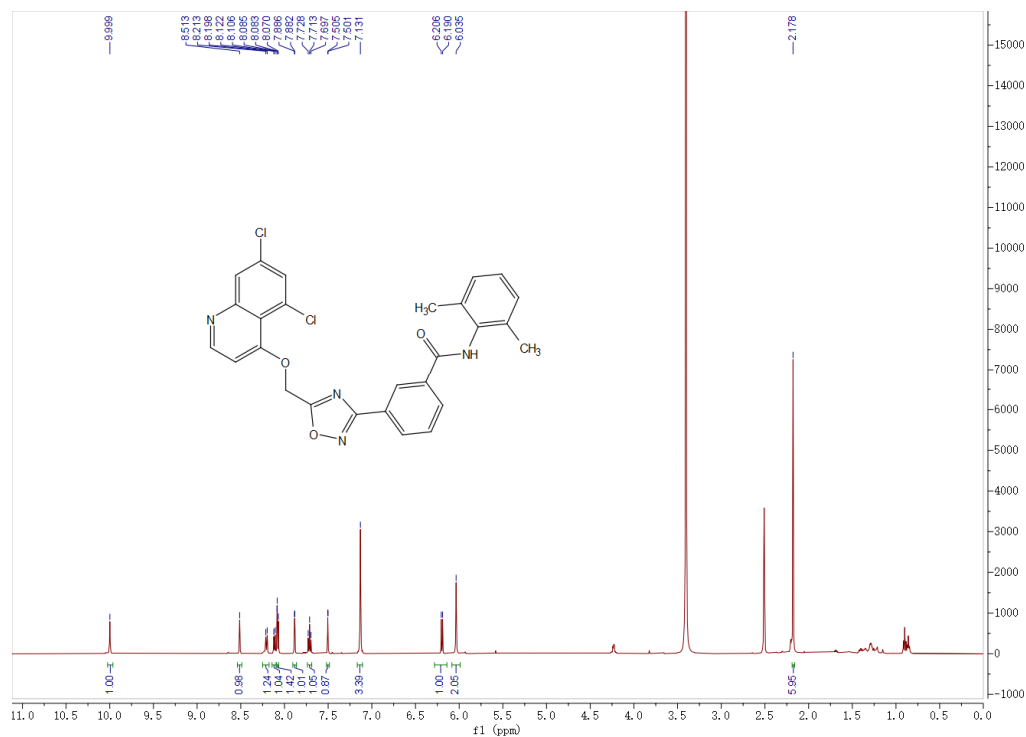

Figure S14. <sup>1</sup>H NMR spectra of 13n.



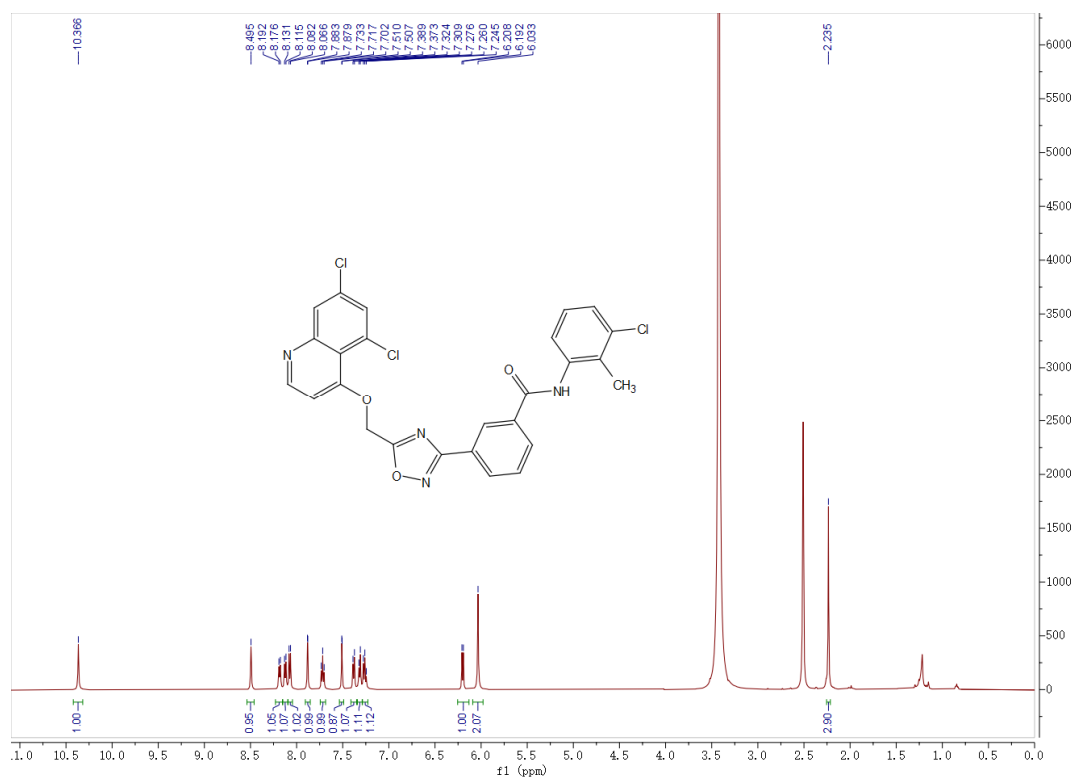

**Figure S15.** <sup>1</sup>H NMR spectra of **13o**.

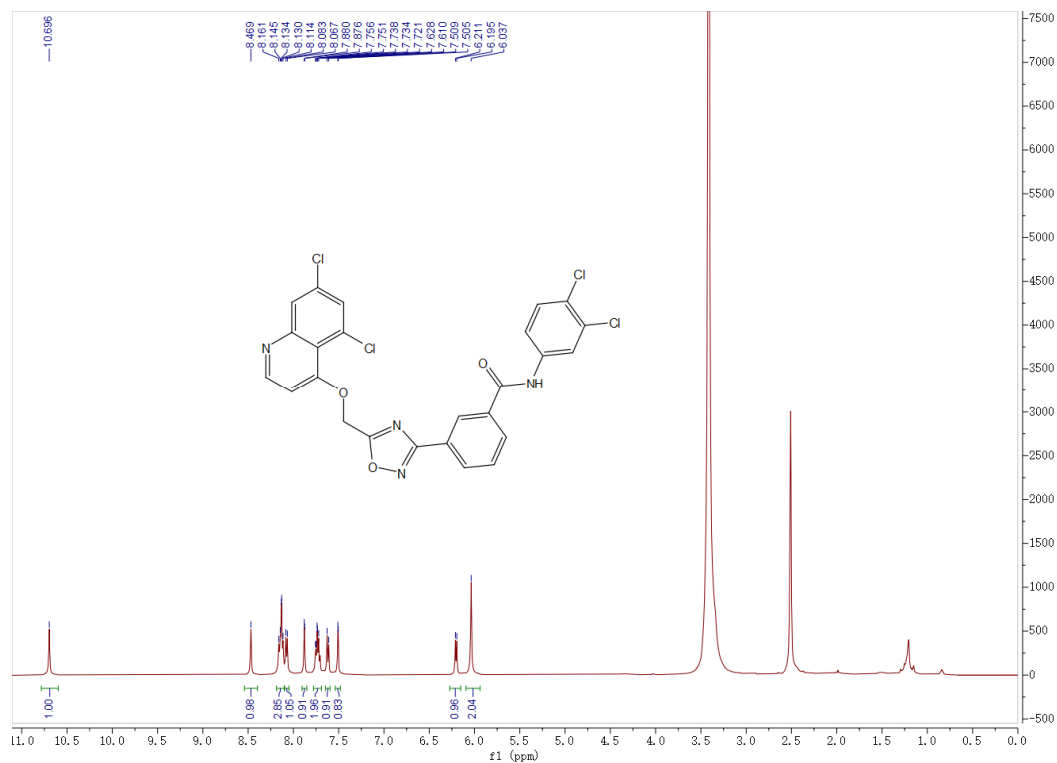

**Figure S16.** <sup>1</sup>H NMR spectra of **13p**.

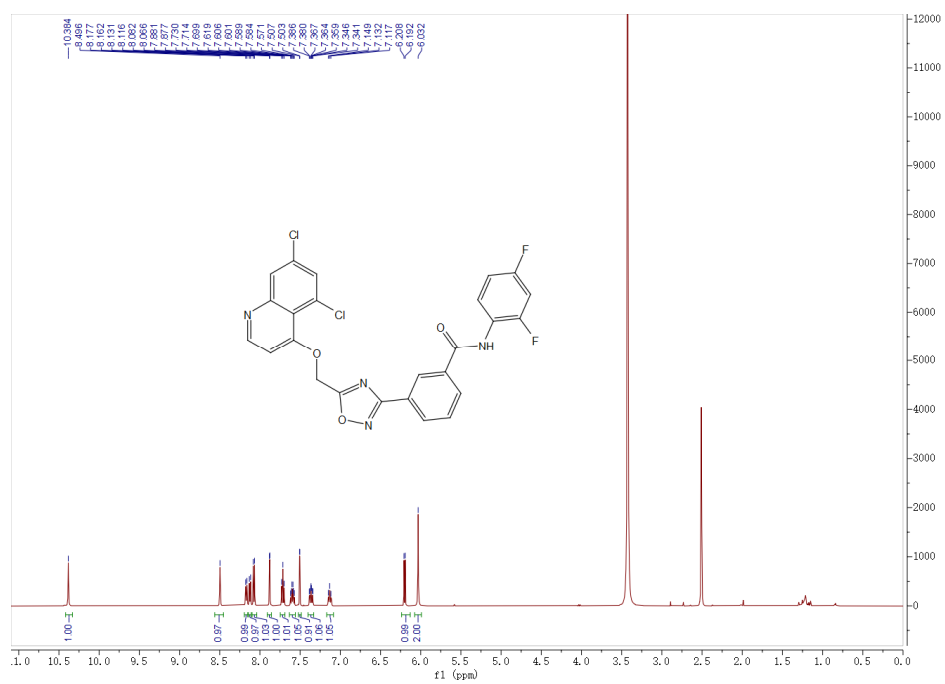

Figure S17. <sup>1</sup>H NMR spectra of 13q.

## 2. $^{13}\text{C}$ NMR spectra of 13a~13q

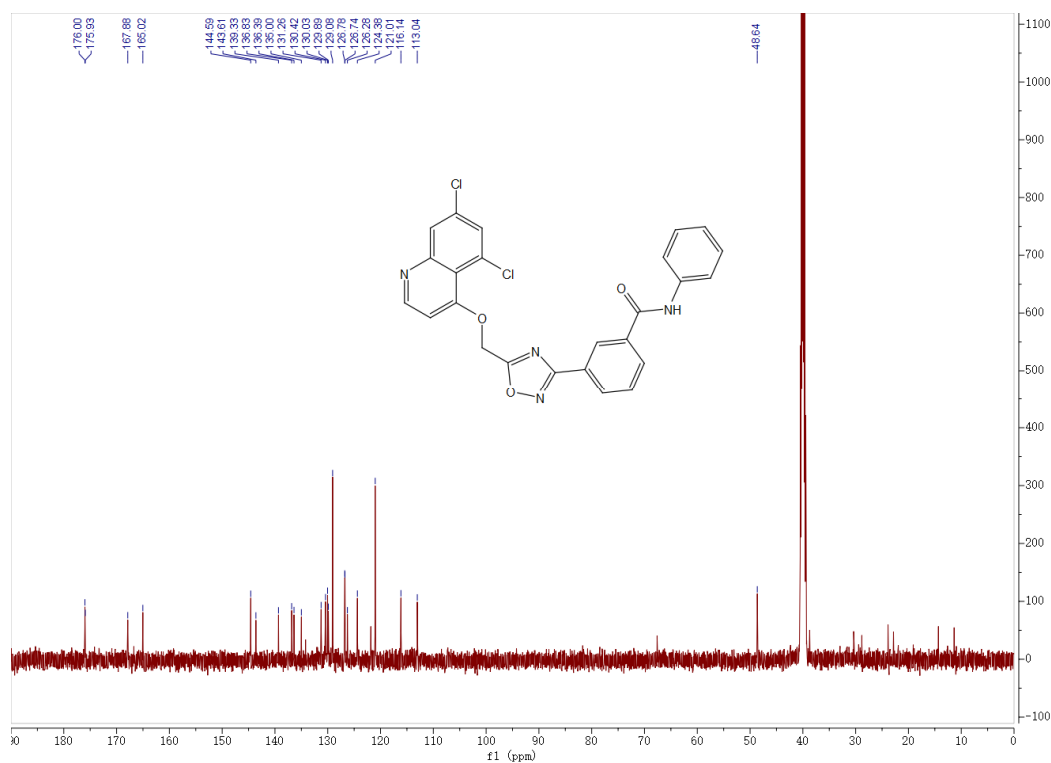

Figure S18.  $^{13}\text{C}$  NMR spectra of 13a.

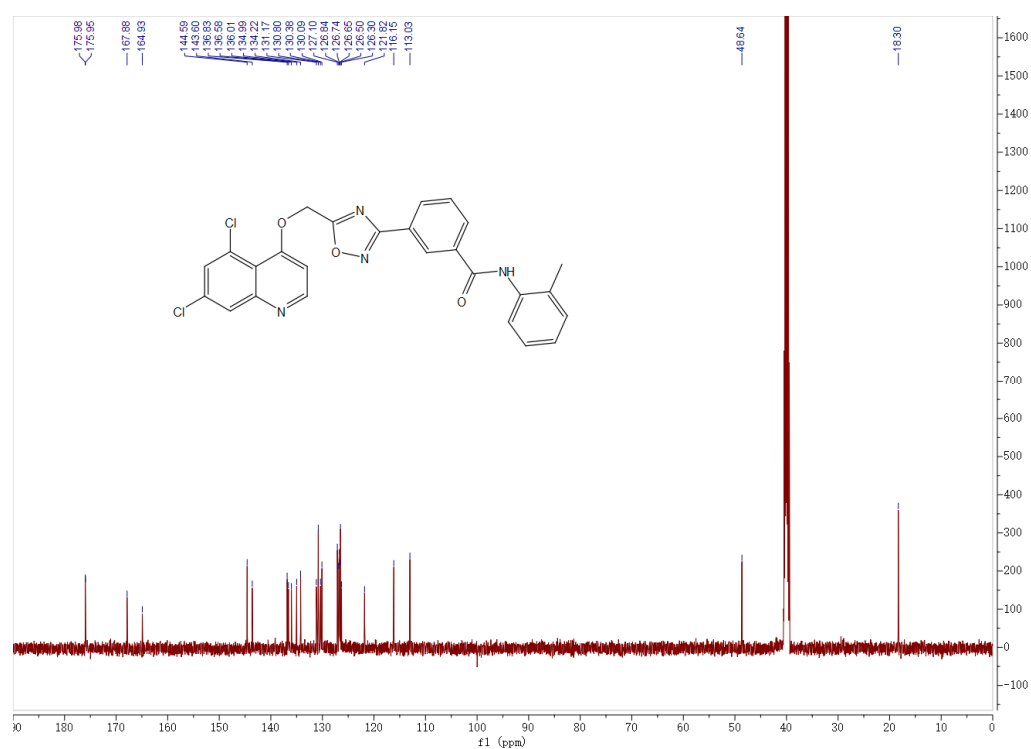

Figure S19.  $^{13}\text{C}$  NMR spectra of 13b.

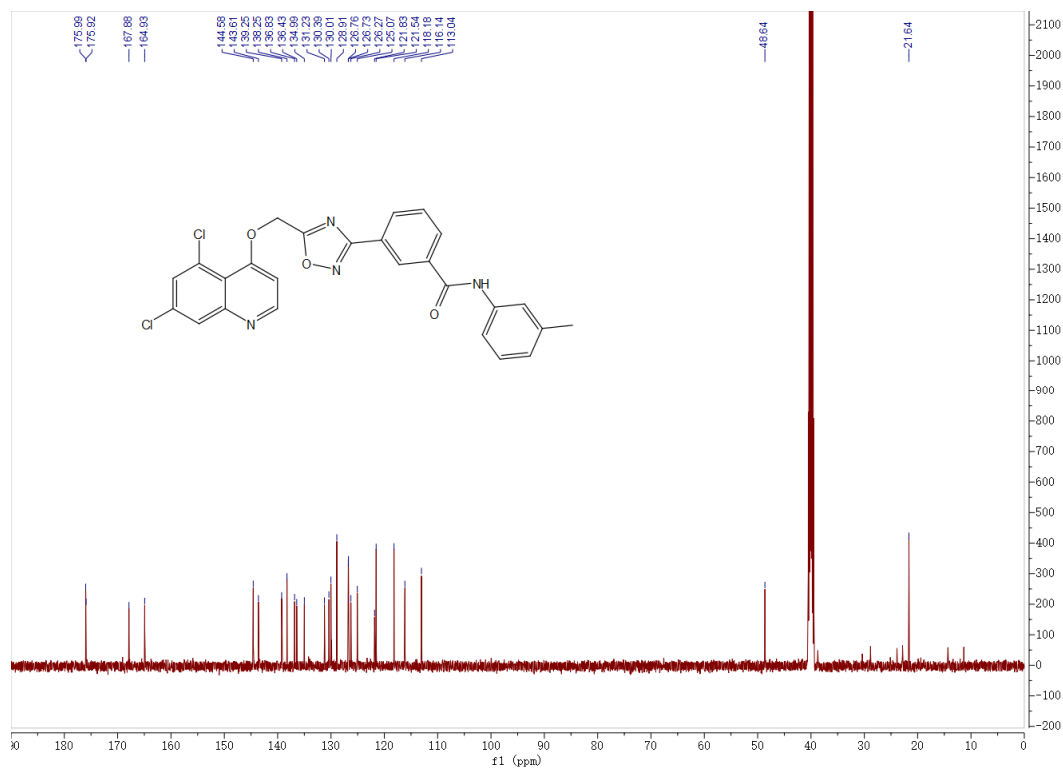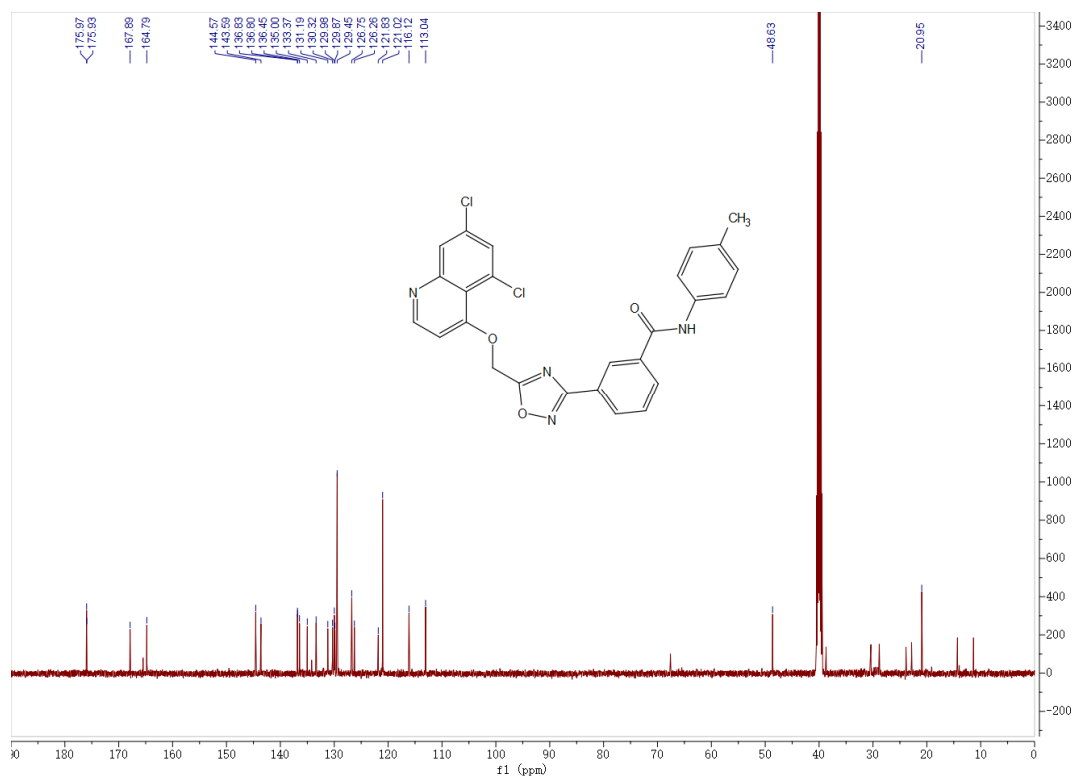

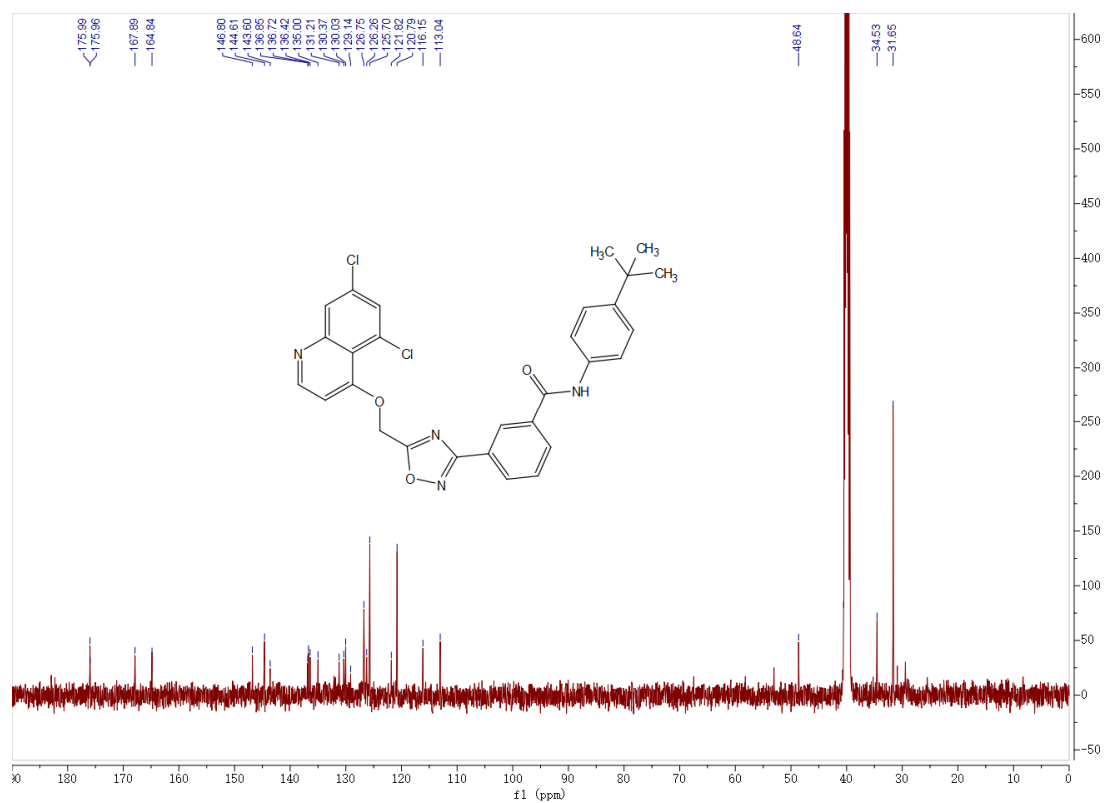

**Figure S22.**  $^{13}\text{C}$  NMR spectra of **13e**.

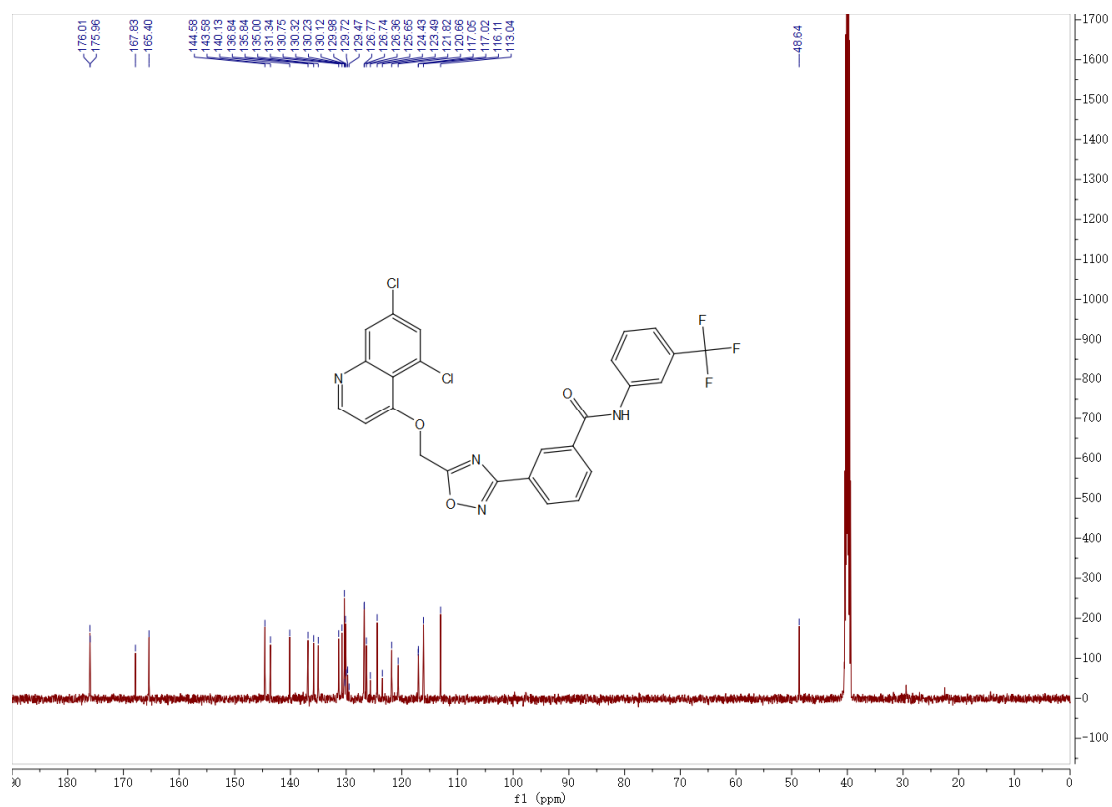

**Figure S23.**  $^{13}\text{C}$  NMR spectra of **13f**.

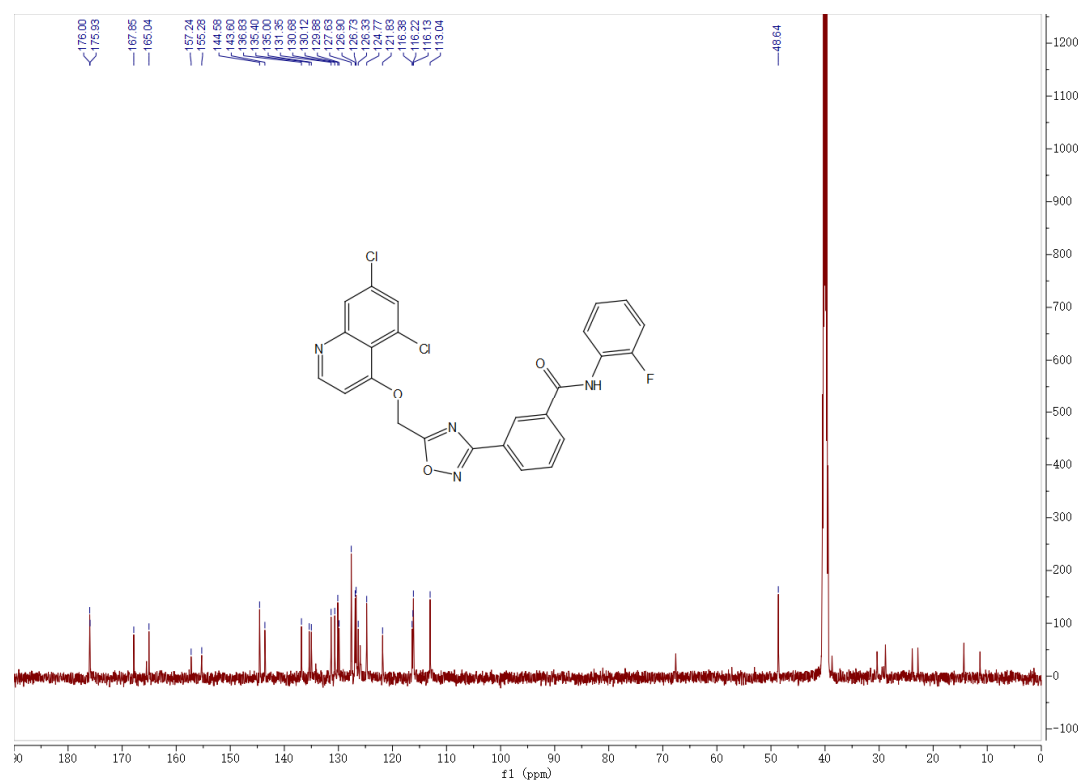

Figure S24. <sup>13</sup>C NMR spectra of 13g.

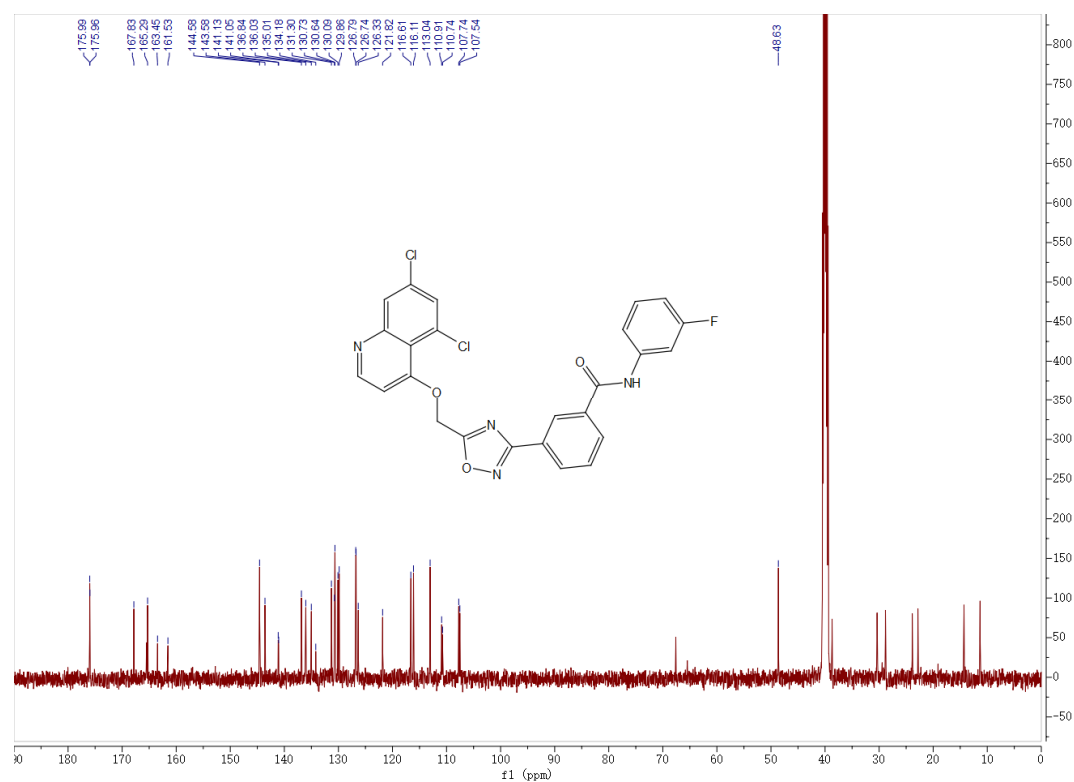

Figure S25. <sup>13</sup>C NMR spectra of 13h.

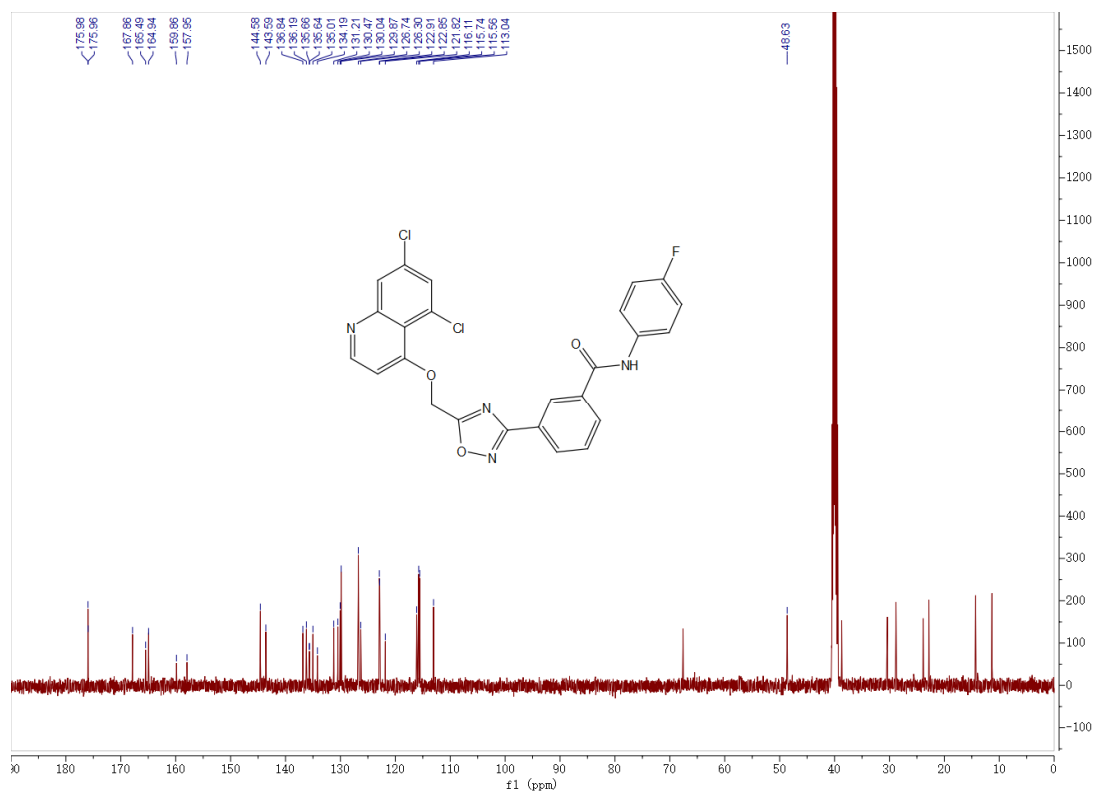

Figure S26.  $^{13}\text{C}$  NMR spectra of 13i.

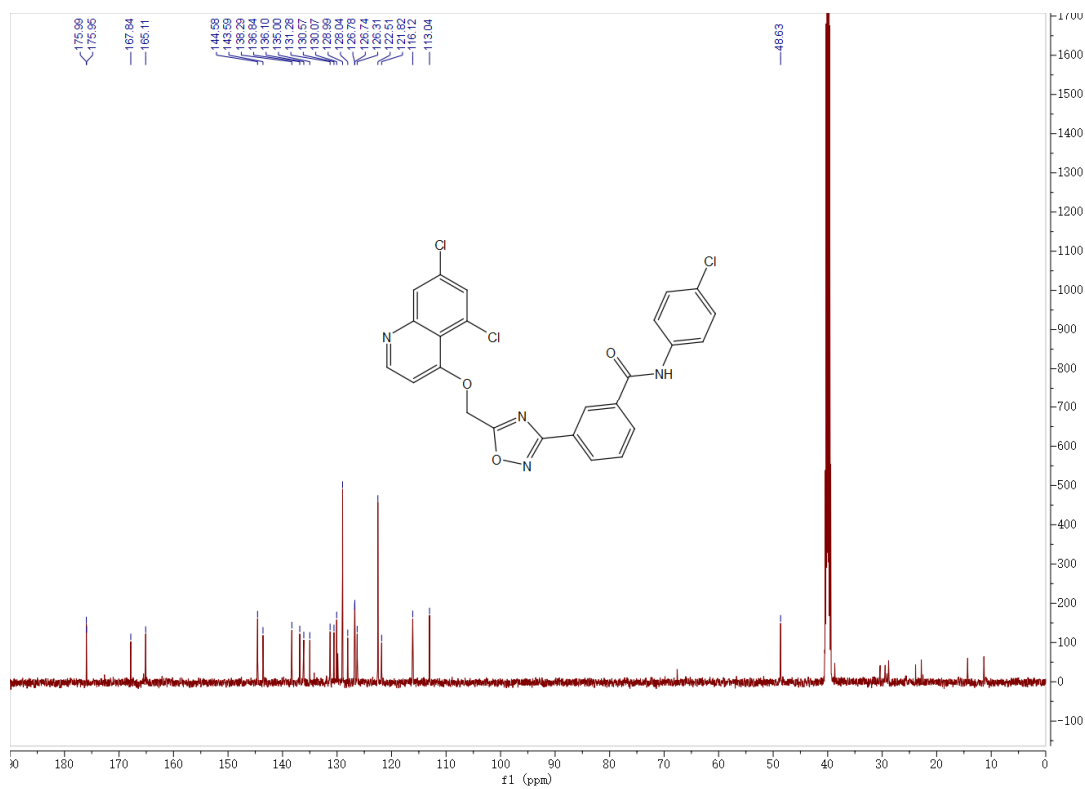

Figure S27.  $^{13}\text{C}$  NMR spectra of 13j.

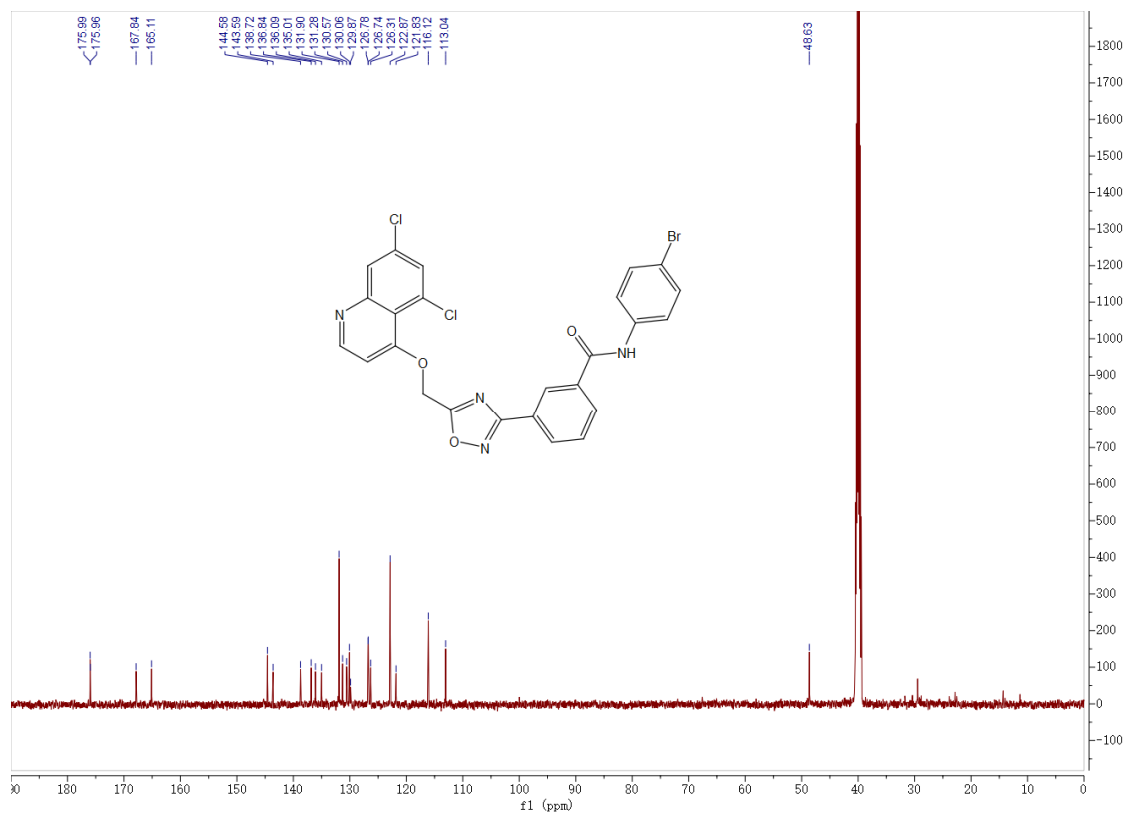

Figure S28. <sup>13</sup>C NMR spectra of 13k.

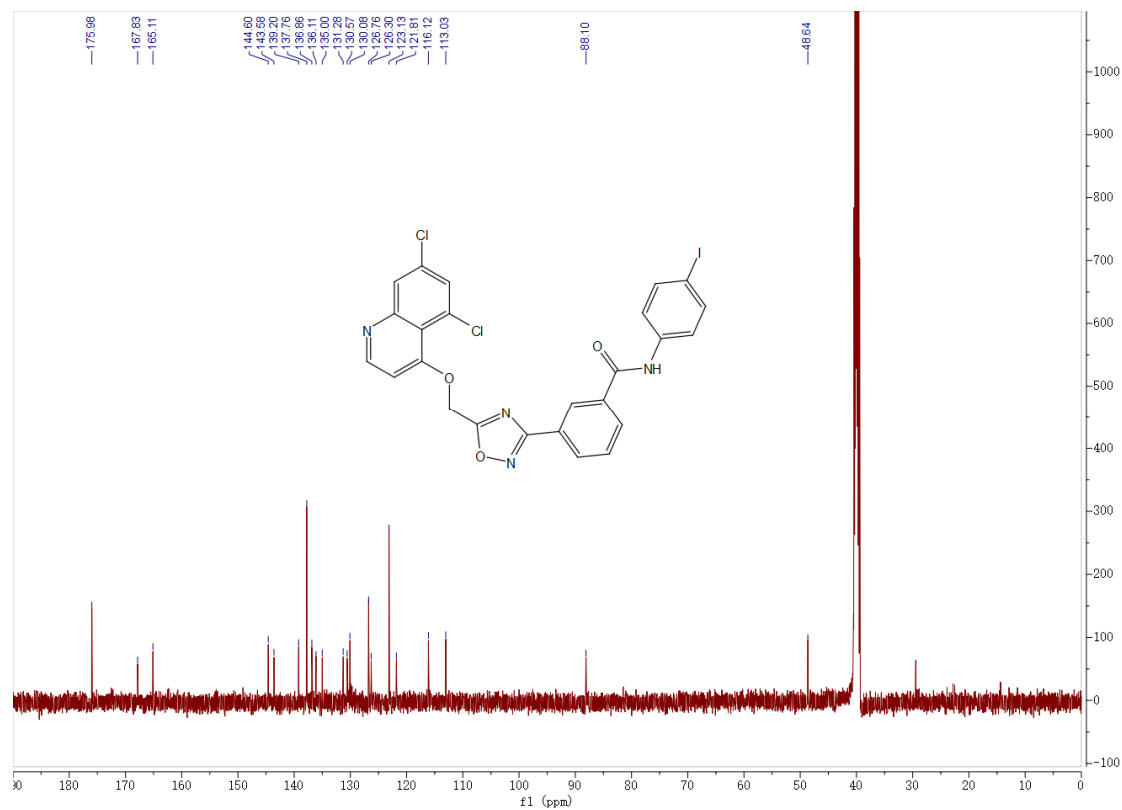

Figure S29. <sup>13</sup>C NMR spectra of 13l.



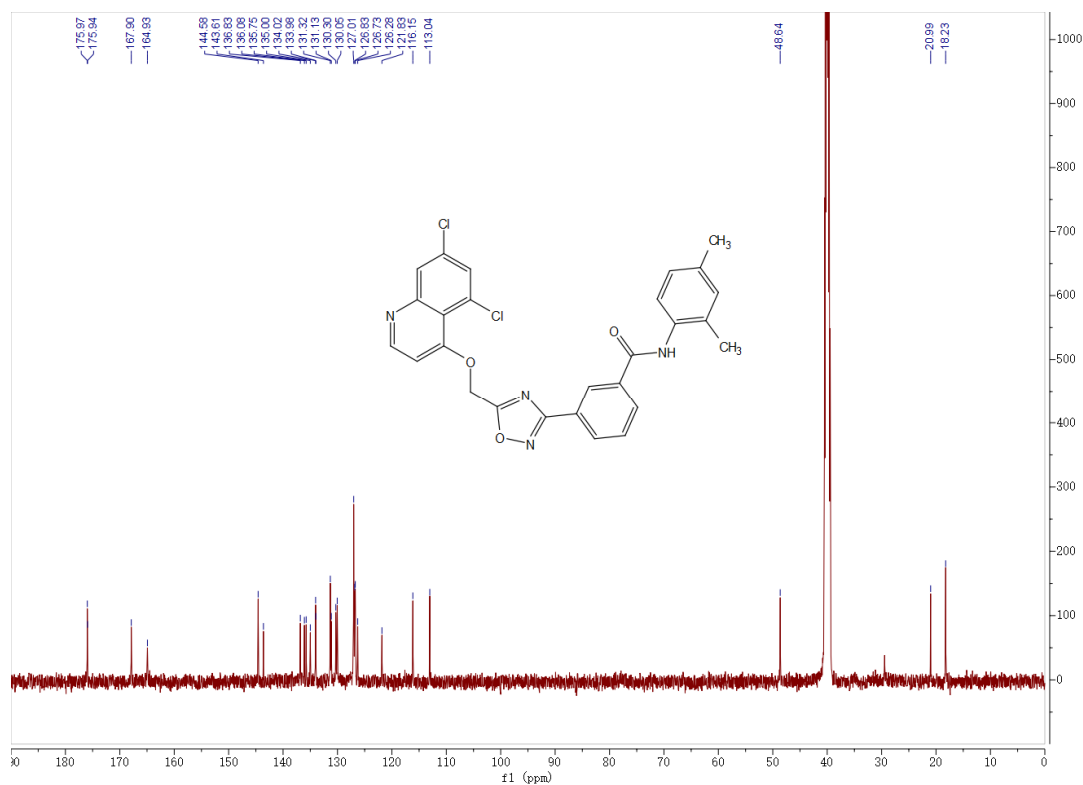

Figure S30.  $^{13}\text{C}$  NMR spectra of 13m.

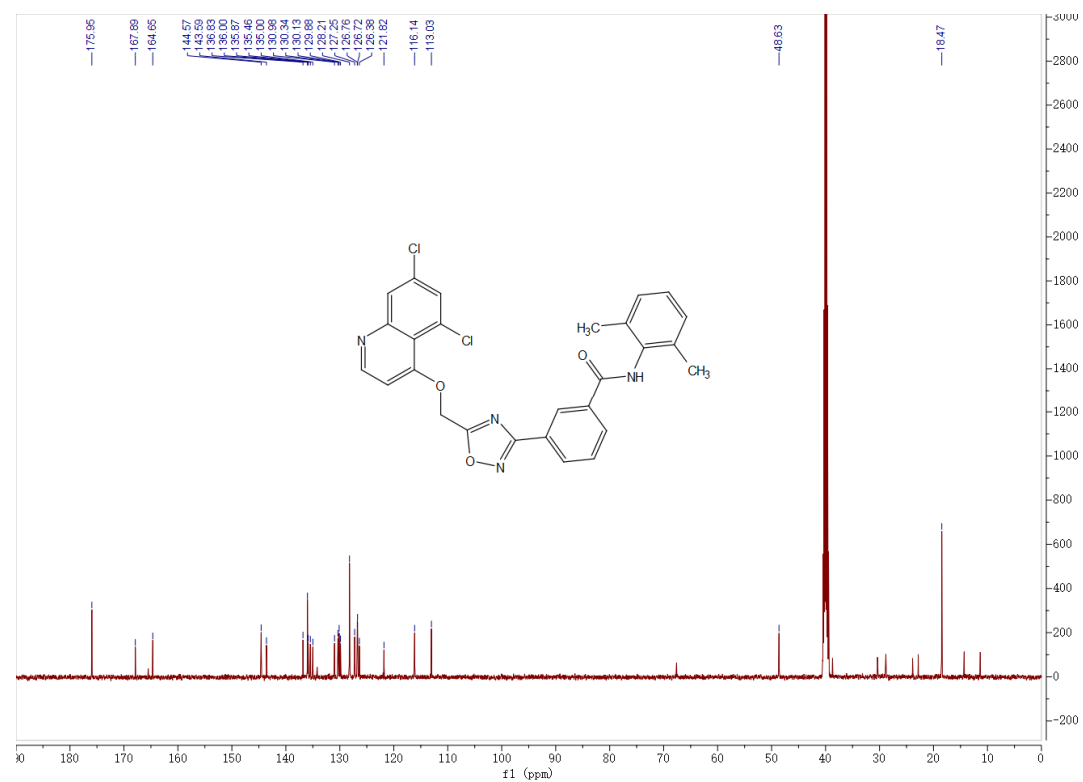

Figure S31.  $^{13}\text{C}$  NMR spectra of 13n.

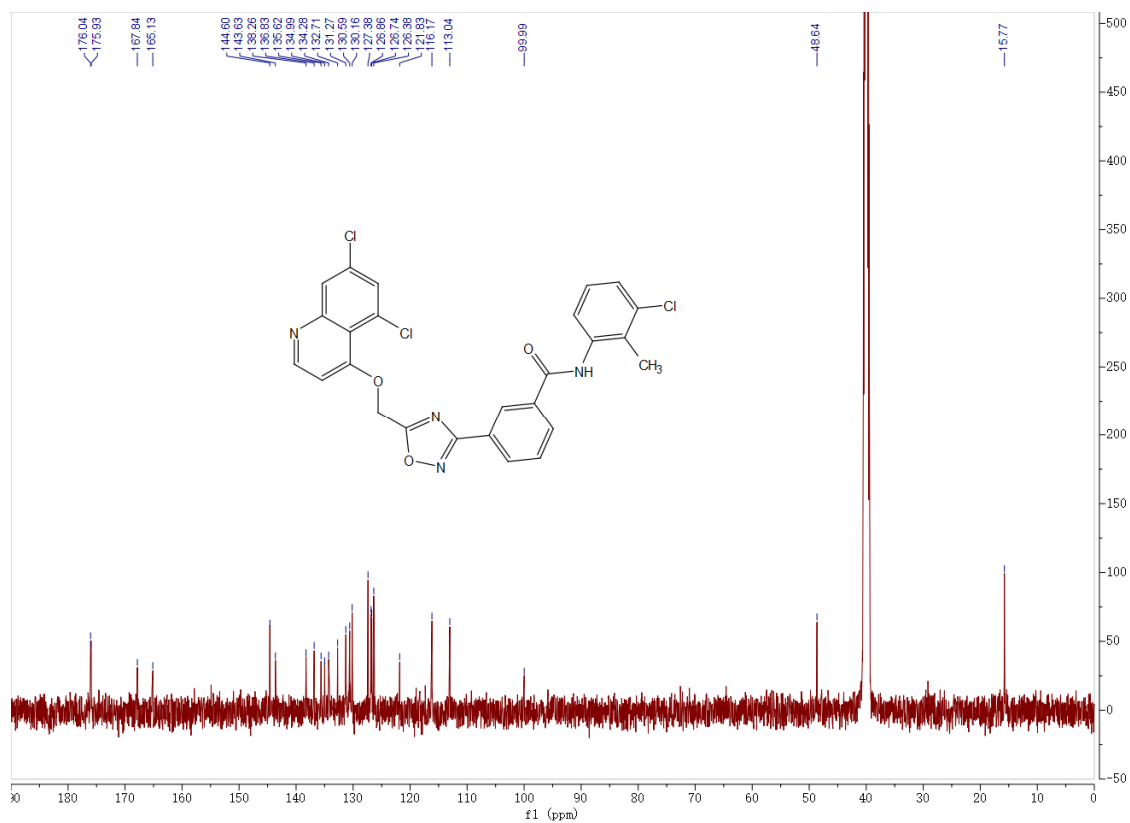

Figure S32. <sup>13</sup>C NMR spectra of 13o.

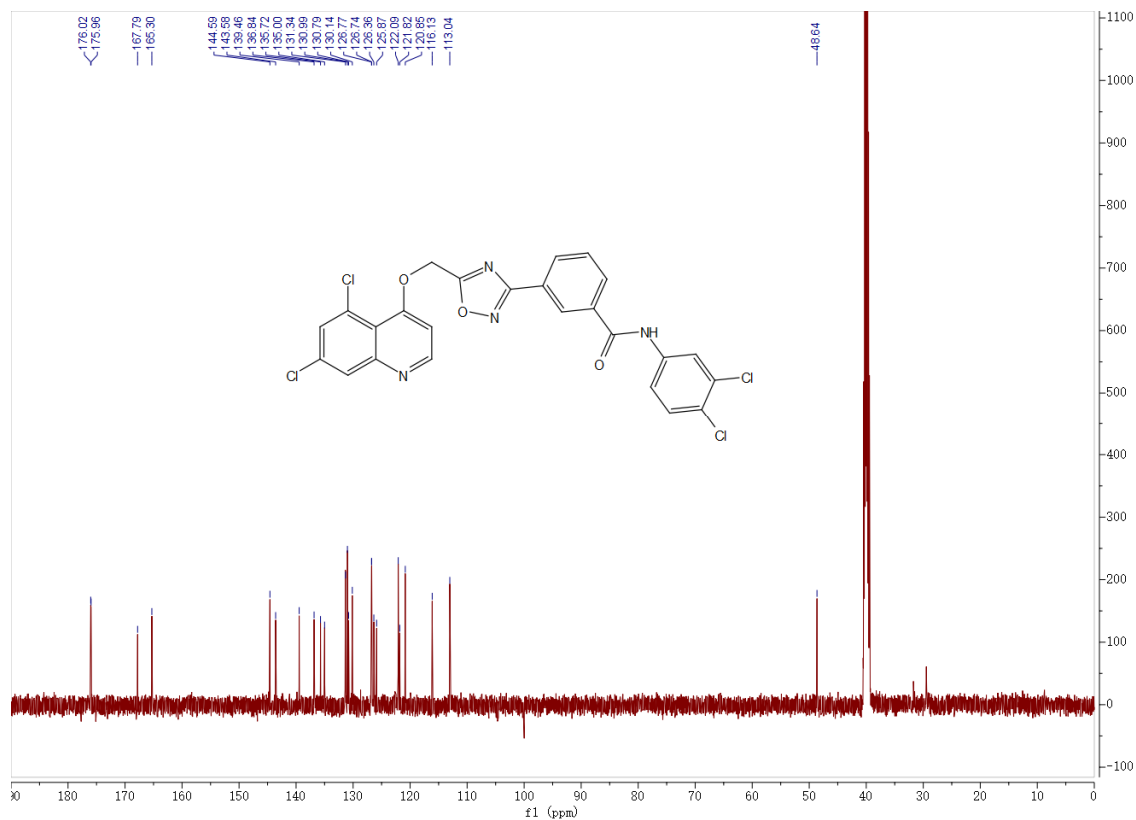

Figure S33. <sup>13</sup>C NMR spectra of 13p.

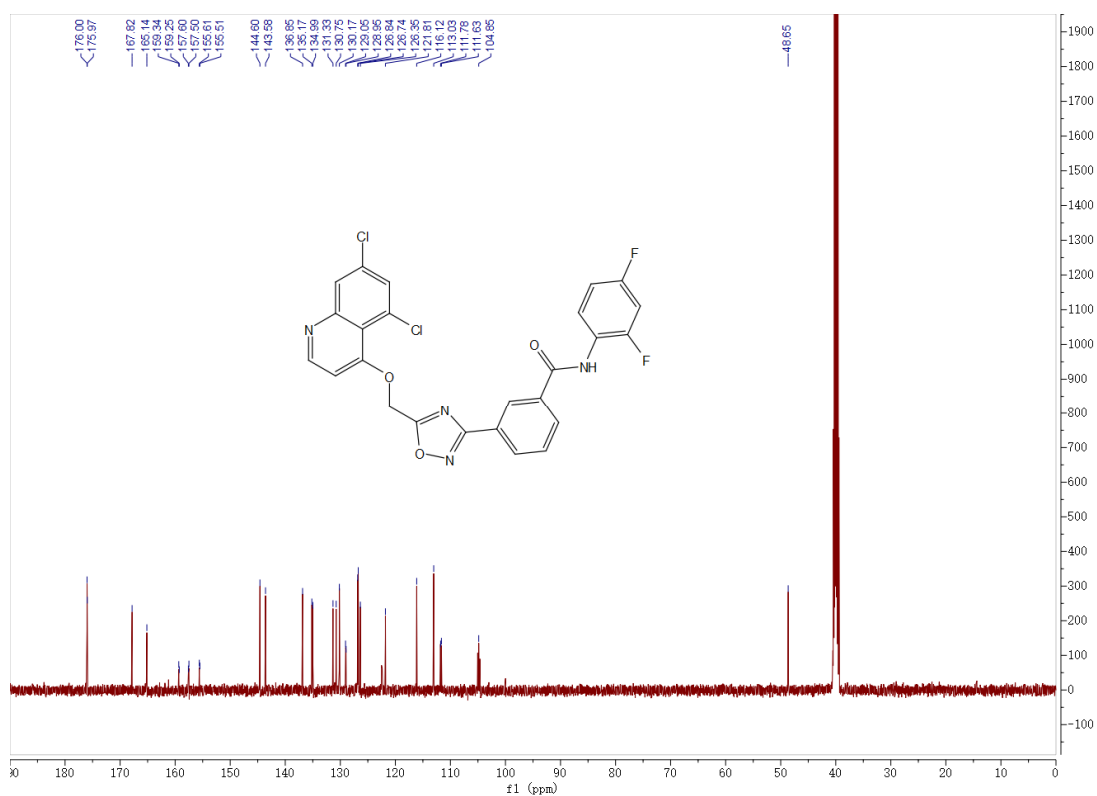

Figure S34.  $^{13}\text{C}$  NMR spectra of 13q.

### 3. ESI-HRMS spectra of 13a~13q

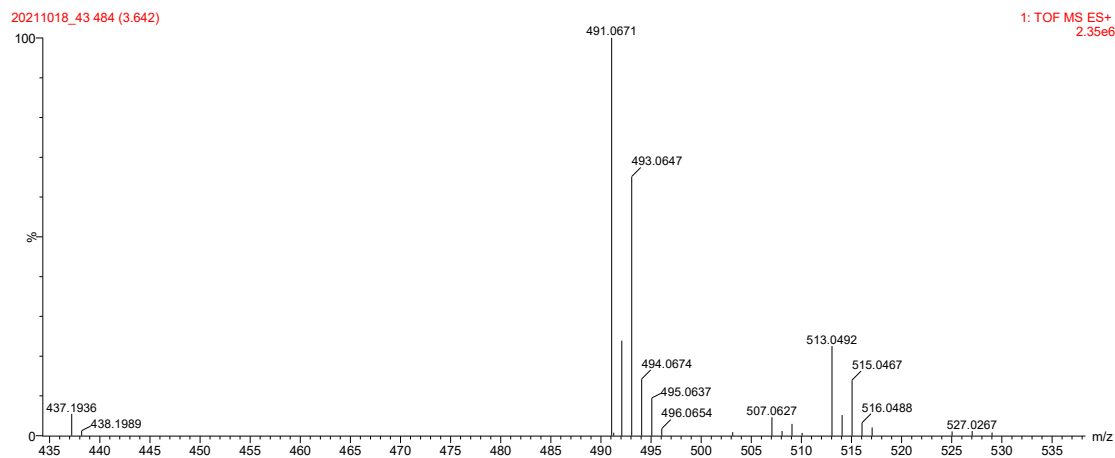

Figure S35. ESI-HRMS spectra of 13a.

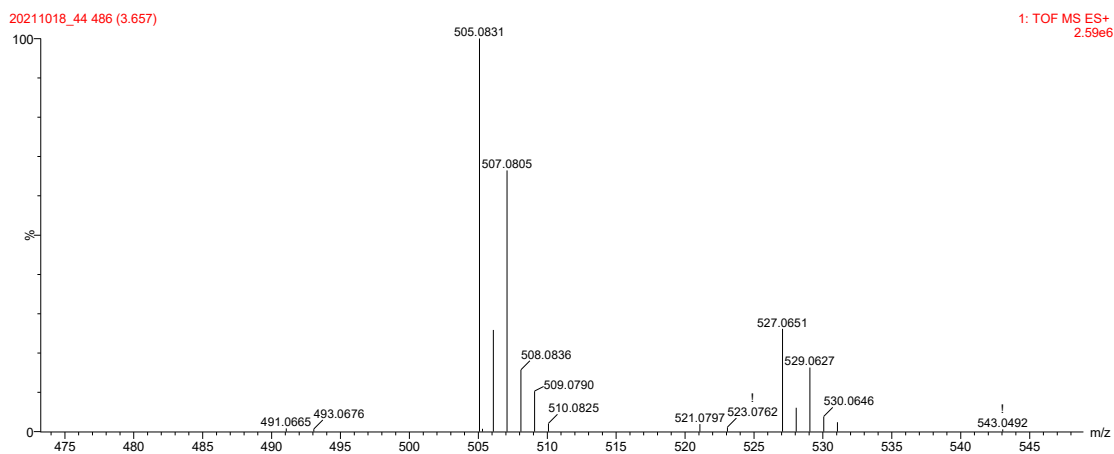

Figure S36. ESI-HRMS spectra of 13b.

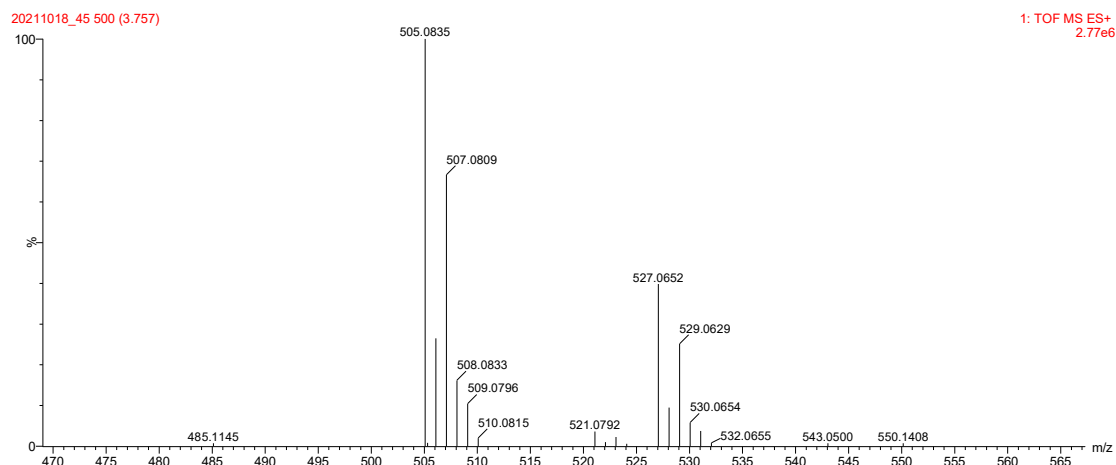

**Figure S37.** ESI-HRMS spectra of **13c**.

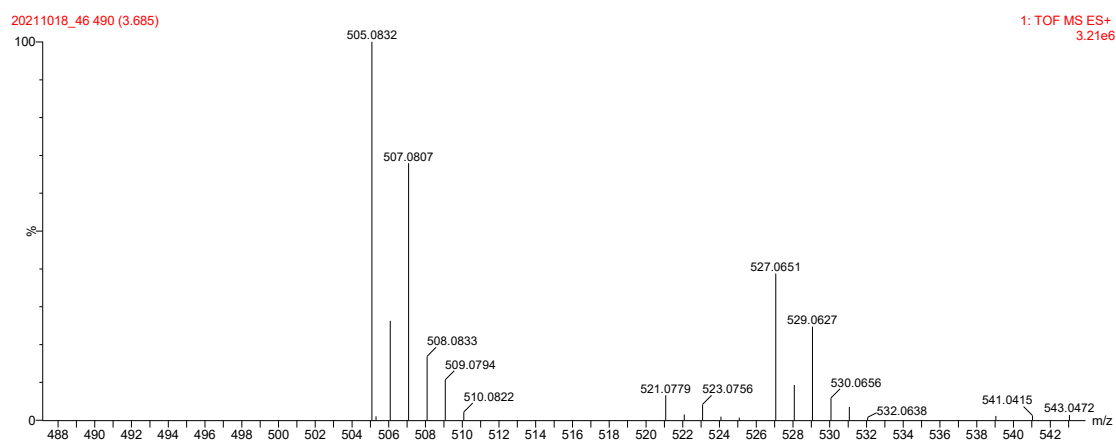

**Figure S38.** ESI-HRMS spectra of **13d**.

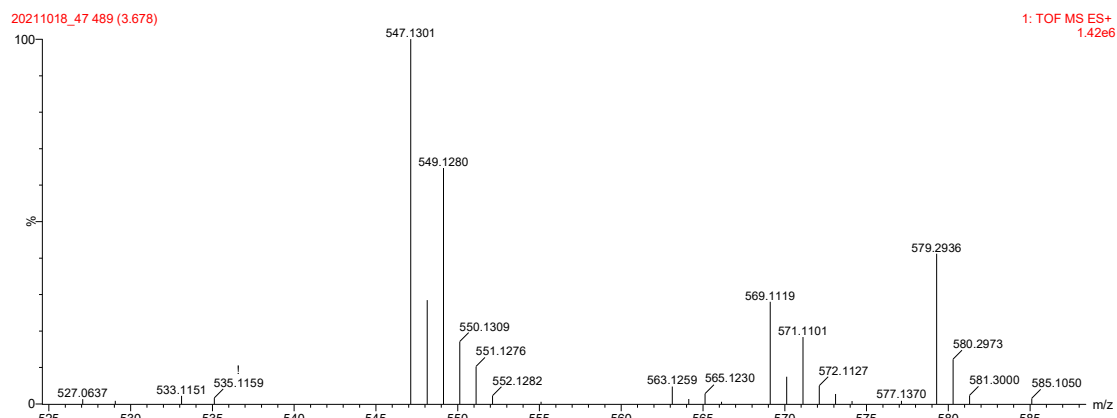

**Figure S39.** ESI-HRMS spectra of **13e**.

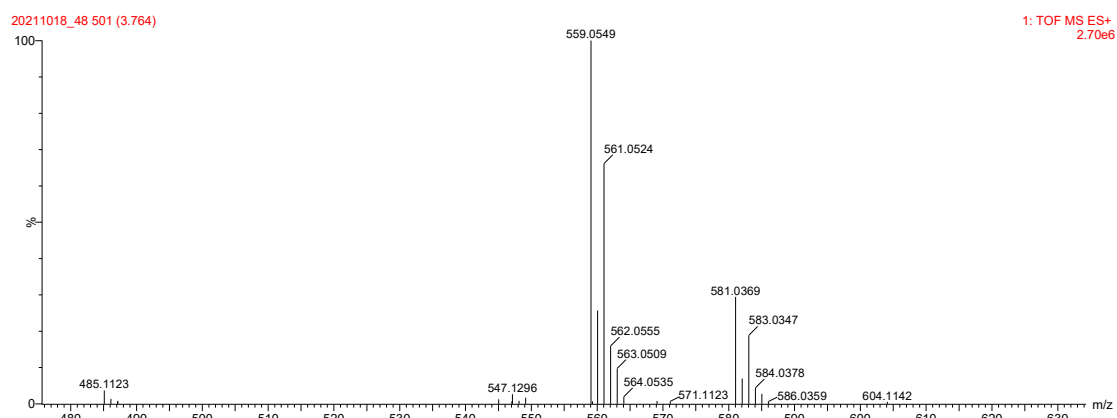

**Figure S40.** ESI-HRMS spectra of **13f**.

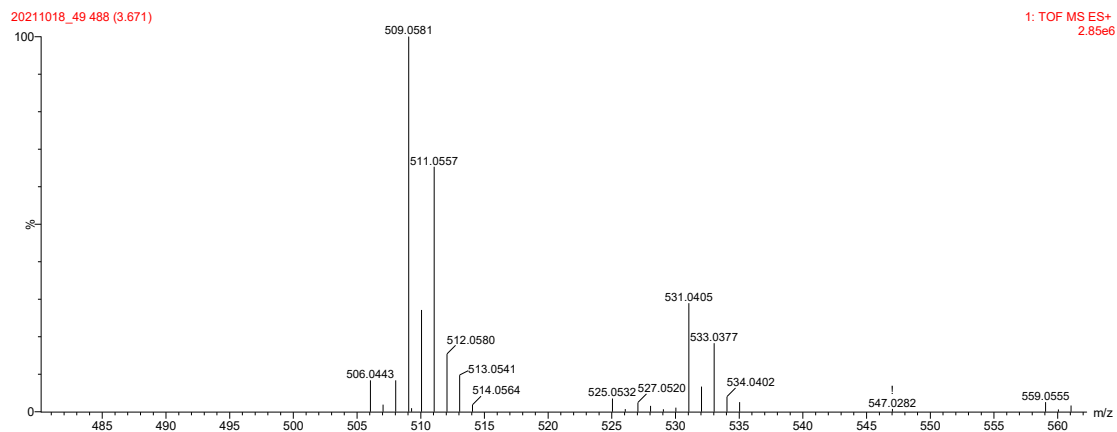

**Figure S41.** ESI-HRMS spectra of **13g**.

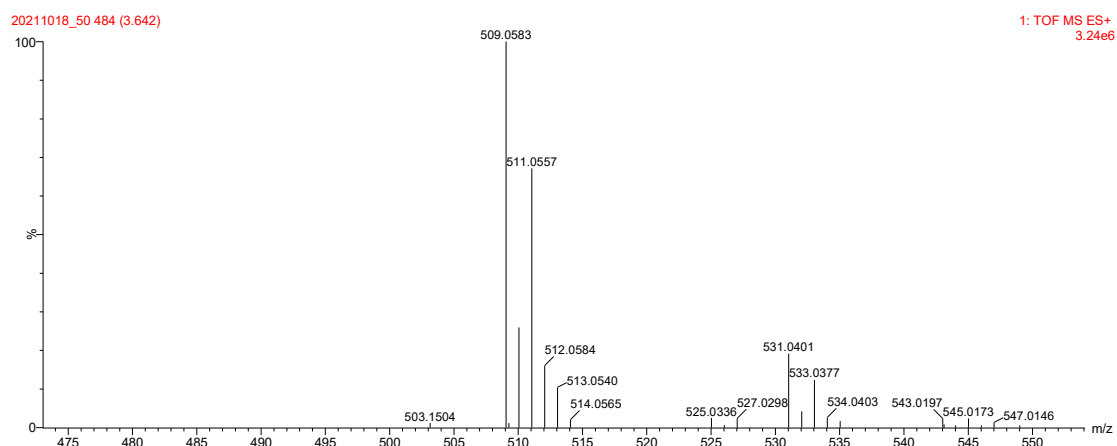

**Figure S42.** ESI-HRMS spectra of **13h**.

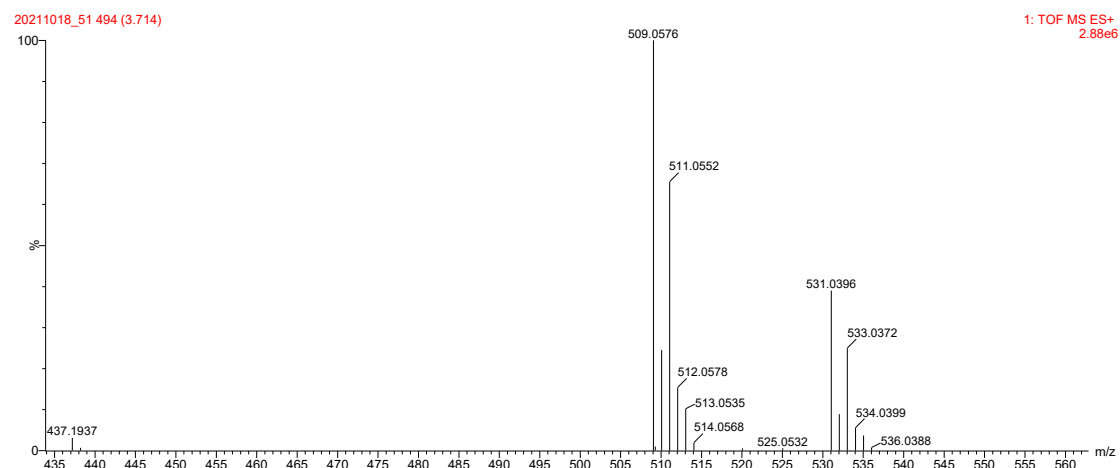

**Figure S43.** ESI-HRMS spectra of **13i**.

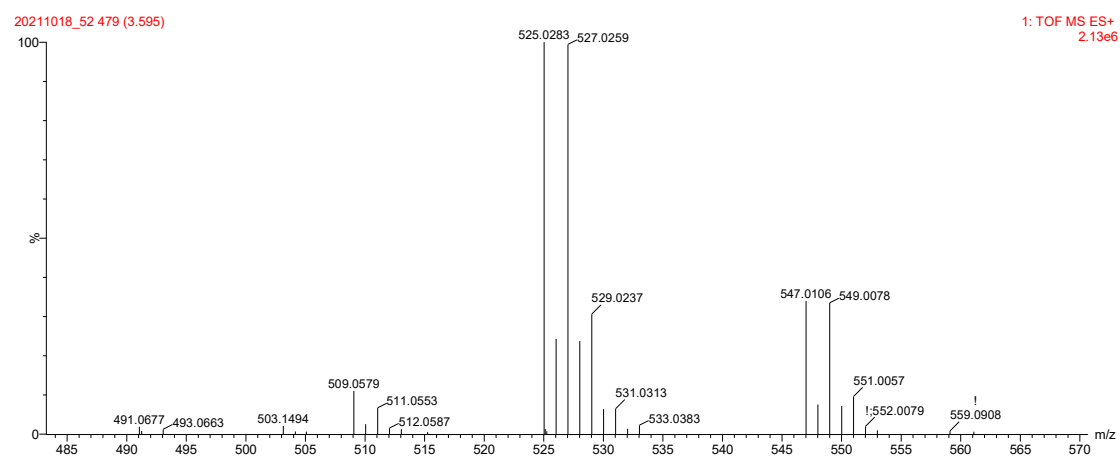

**Figure S44.** ESI-HRMS spectra of **13j**.



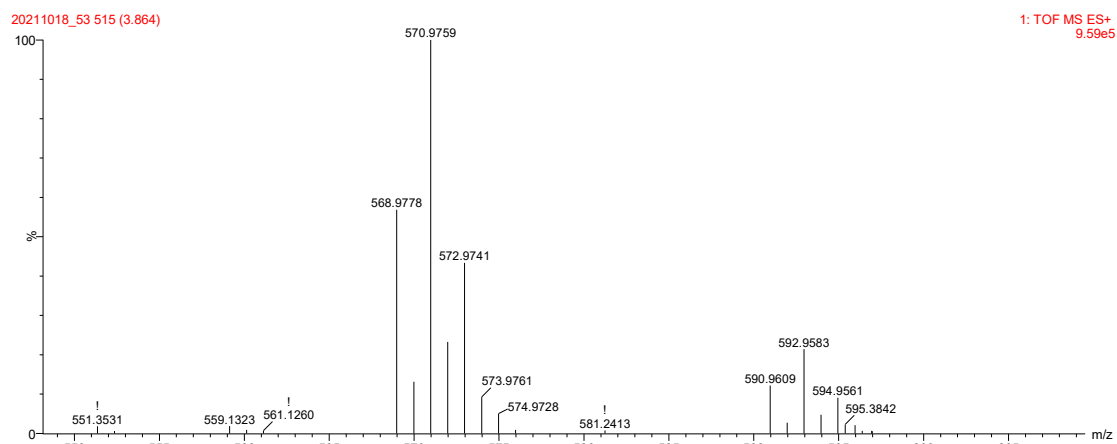

**Figure S45.** ESI-HRMS spectra of **13k**.

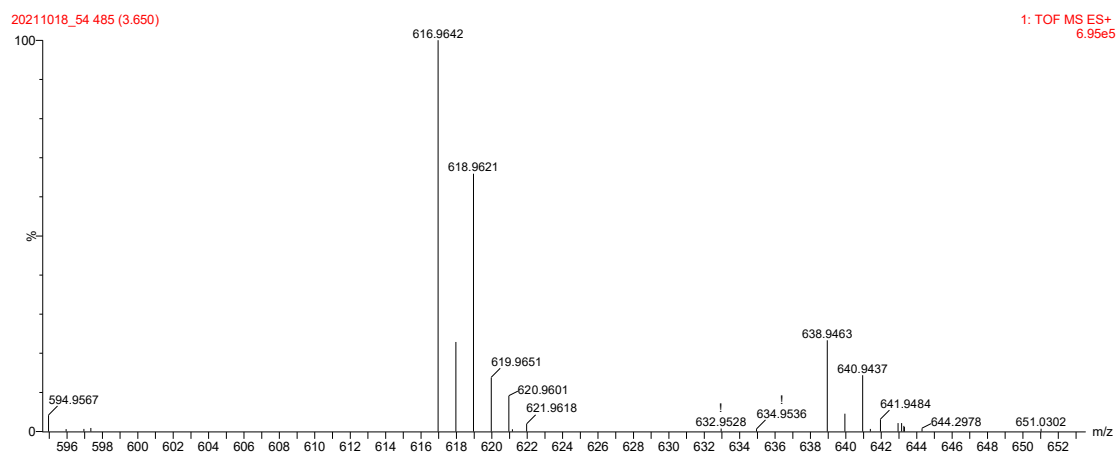

**Figure S46.** ESI-HRMS spectra of **13l**.

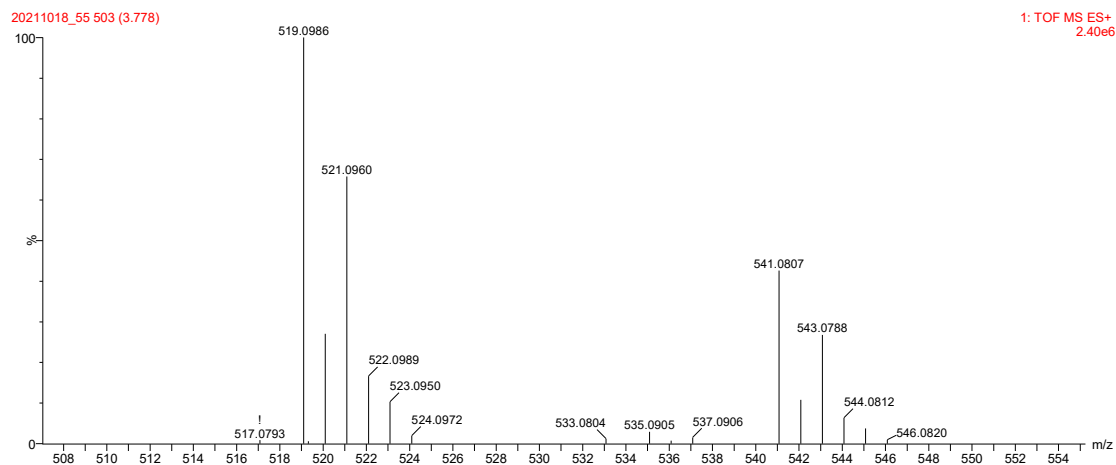

**Figure S47.** ESI-HRMS spectra of **13m**.

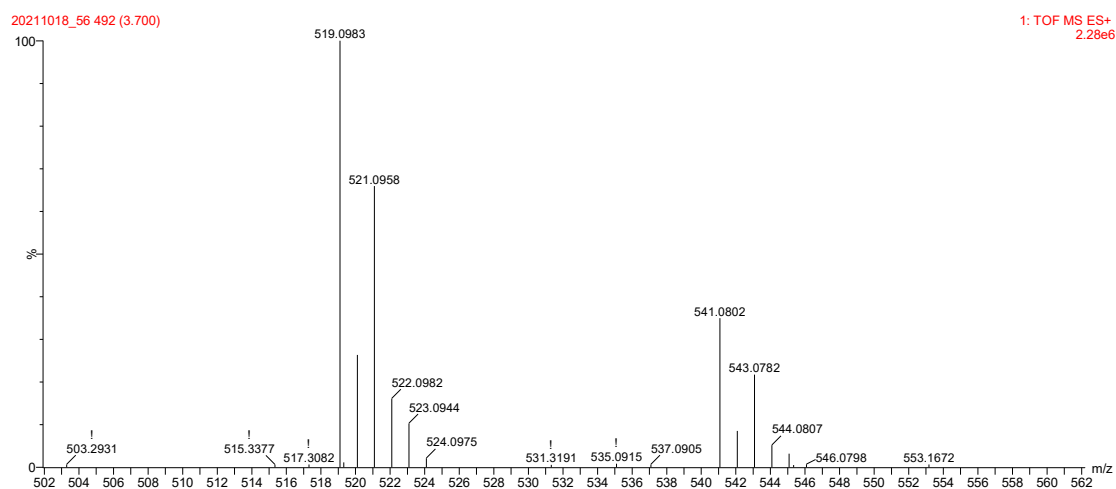

**Figure S48.** ESI-HRMS spectra of **13n**.

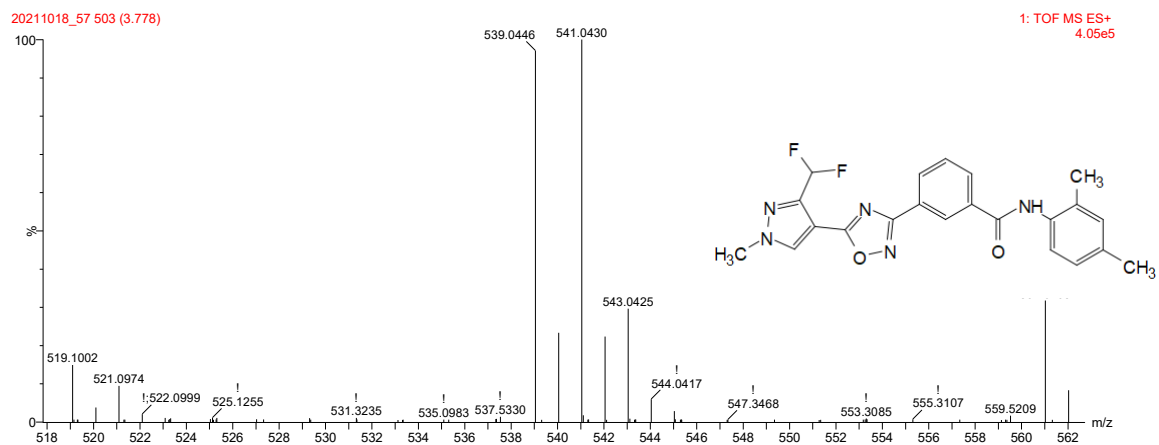

Figure S49. ESI-HRMS spectra of 13o.

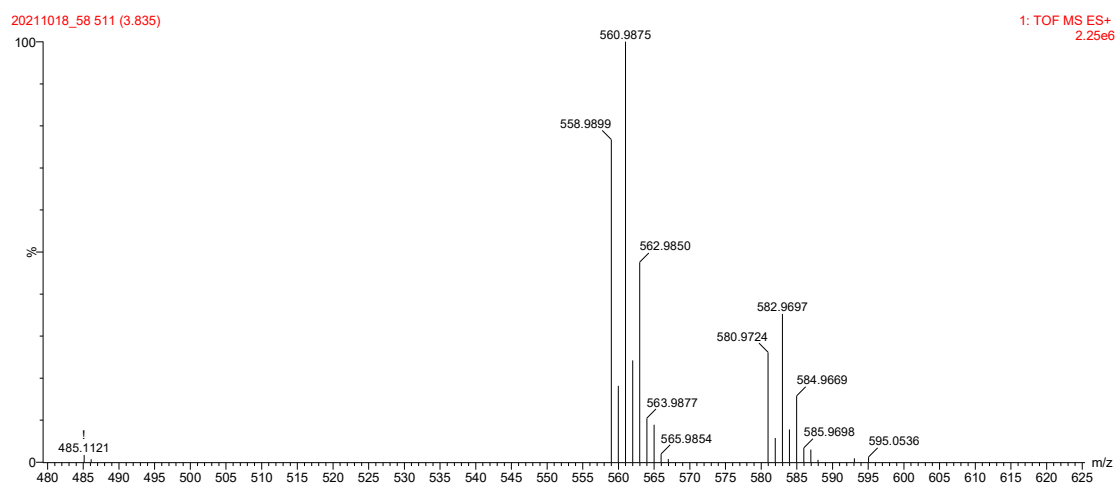

Figure S50. ESI-HRMS spectra of 13p.

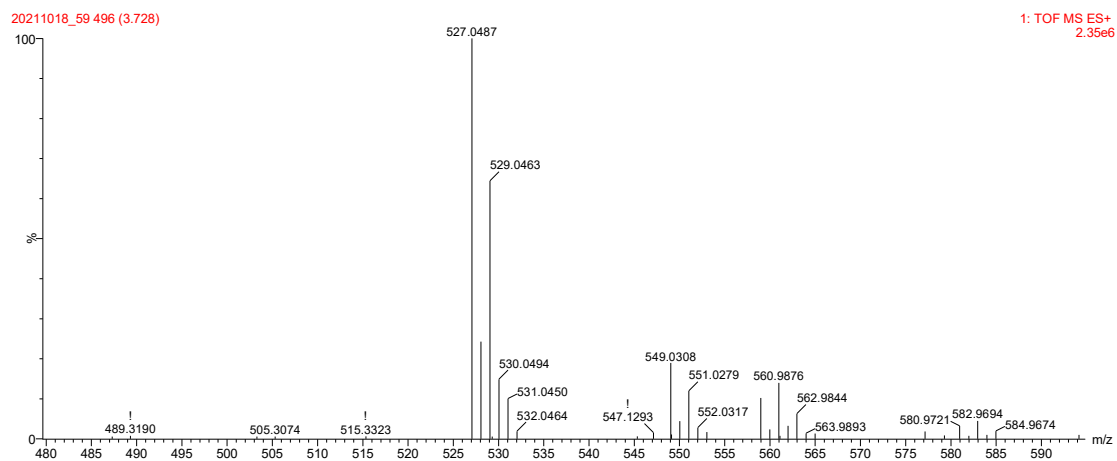

**Figure S51.** ESI-HRMS spectra of **13q**.
